# Supplementary material for: Synthesis, Cytotoxicity, and Photophysical Investigations of 2-Amino-4,6-diphenylnicotinonitriles: An Experimental and Theoretical Study
Source: MDPI journal article supplement (doi:10.3390/molecules29081808), 2024-04-16

Supporting data

# **Synthesis, Cytotoxicity and Photophysical Investigations of 2-Amino-4,6-diphenylnicotinonitriles: An Experimental and Theoretical Study**

**Alwah R. Al-Ghamdi,<sup>1</sup> Shofiur Rahman,<sup>2</sup> Reem I. Al-Wabli,<sup>1</sup> Maha S. Al-Mutairi<sup>1</sup> and A. F. M. Motiur Rahman<sup>1,\*</sup>**

1 Department of Pharmaceutical Chemistry, College of Pharmacy, King Saud University, Riyadh 11451, Saudi Arabia; 439204477@student.ksu.edu.sa (A.R.A-G.), ralwabli@ksu.edu.sa (R.I.A.-W.), malmutbiri@ksu.edu.sa (M.S.A-M.)

2 College of Science, King Saud University, Riyadh 11451, Saudi Arabia mrahman1@ksu.edu.sa (S.A.),

\*Correspondence: afmrahman@ksu.edu.sa; Tel.: +966-11-46-70237 (A.F.M.M.R.)

| Content                         | Page No. | Content                         | Page No. |
|---------------------------------|----------|---------------------------------|----------|
| <sup>1</sup> H-NMR of <b>1</b>  | 3        | <sup>1</sup> H-NMR of <b>4</b>  | 12       |
| <sup>13</sup> C-NMR of <b>1</b> | 4        | <sup>13</sup> C-NMR of <b>4</b> | 13       |
| Mass Spectra of <b>1</b>        | 5        | Mass Spectra of <b>4</b>        | 14       |
| <sup>1</sup> H-NMR of <b>2</b>  | 6        | <sup>1</sup> H-NMR of <b>5</b>  | 15       |
| <sup>13</sup> C-NMR of <b>2</b> | 7        | <sup>13</sup> C-NMR of <b>5</b> | 16       |
| Mass Spectra of <b>2</b>        | 8        | Mass Spectra of <b>5</b>        | 17       |
| <sup>1</sup> H-NMR of <b>3</b>  | 9        | <sup>1</sup> H-NMR of <b>6</b>  | 18       |
| <sup>13</sup> C-NMR of <b>3</b> | 10       | <sup>13</sup> C-NMR of <b>6</b> | 19       |
| Mass Spectra of <b>3</b>        | 11       | Mass Spectra of <b>6</b>        | 20       |

$^1\text{H}$ -NMR of **1**

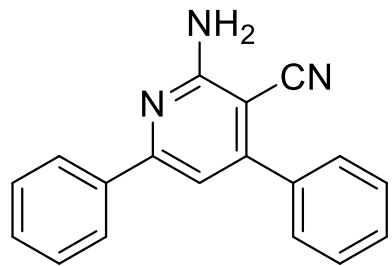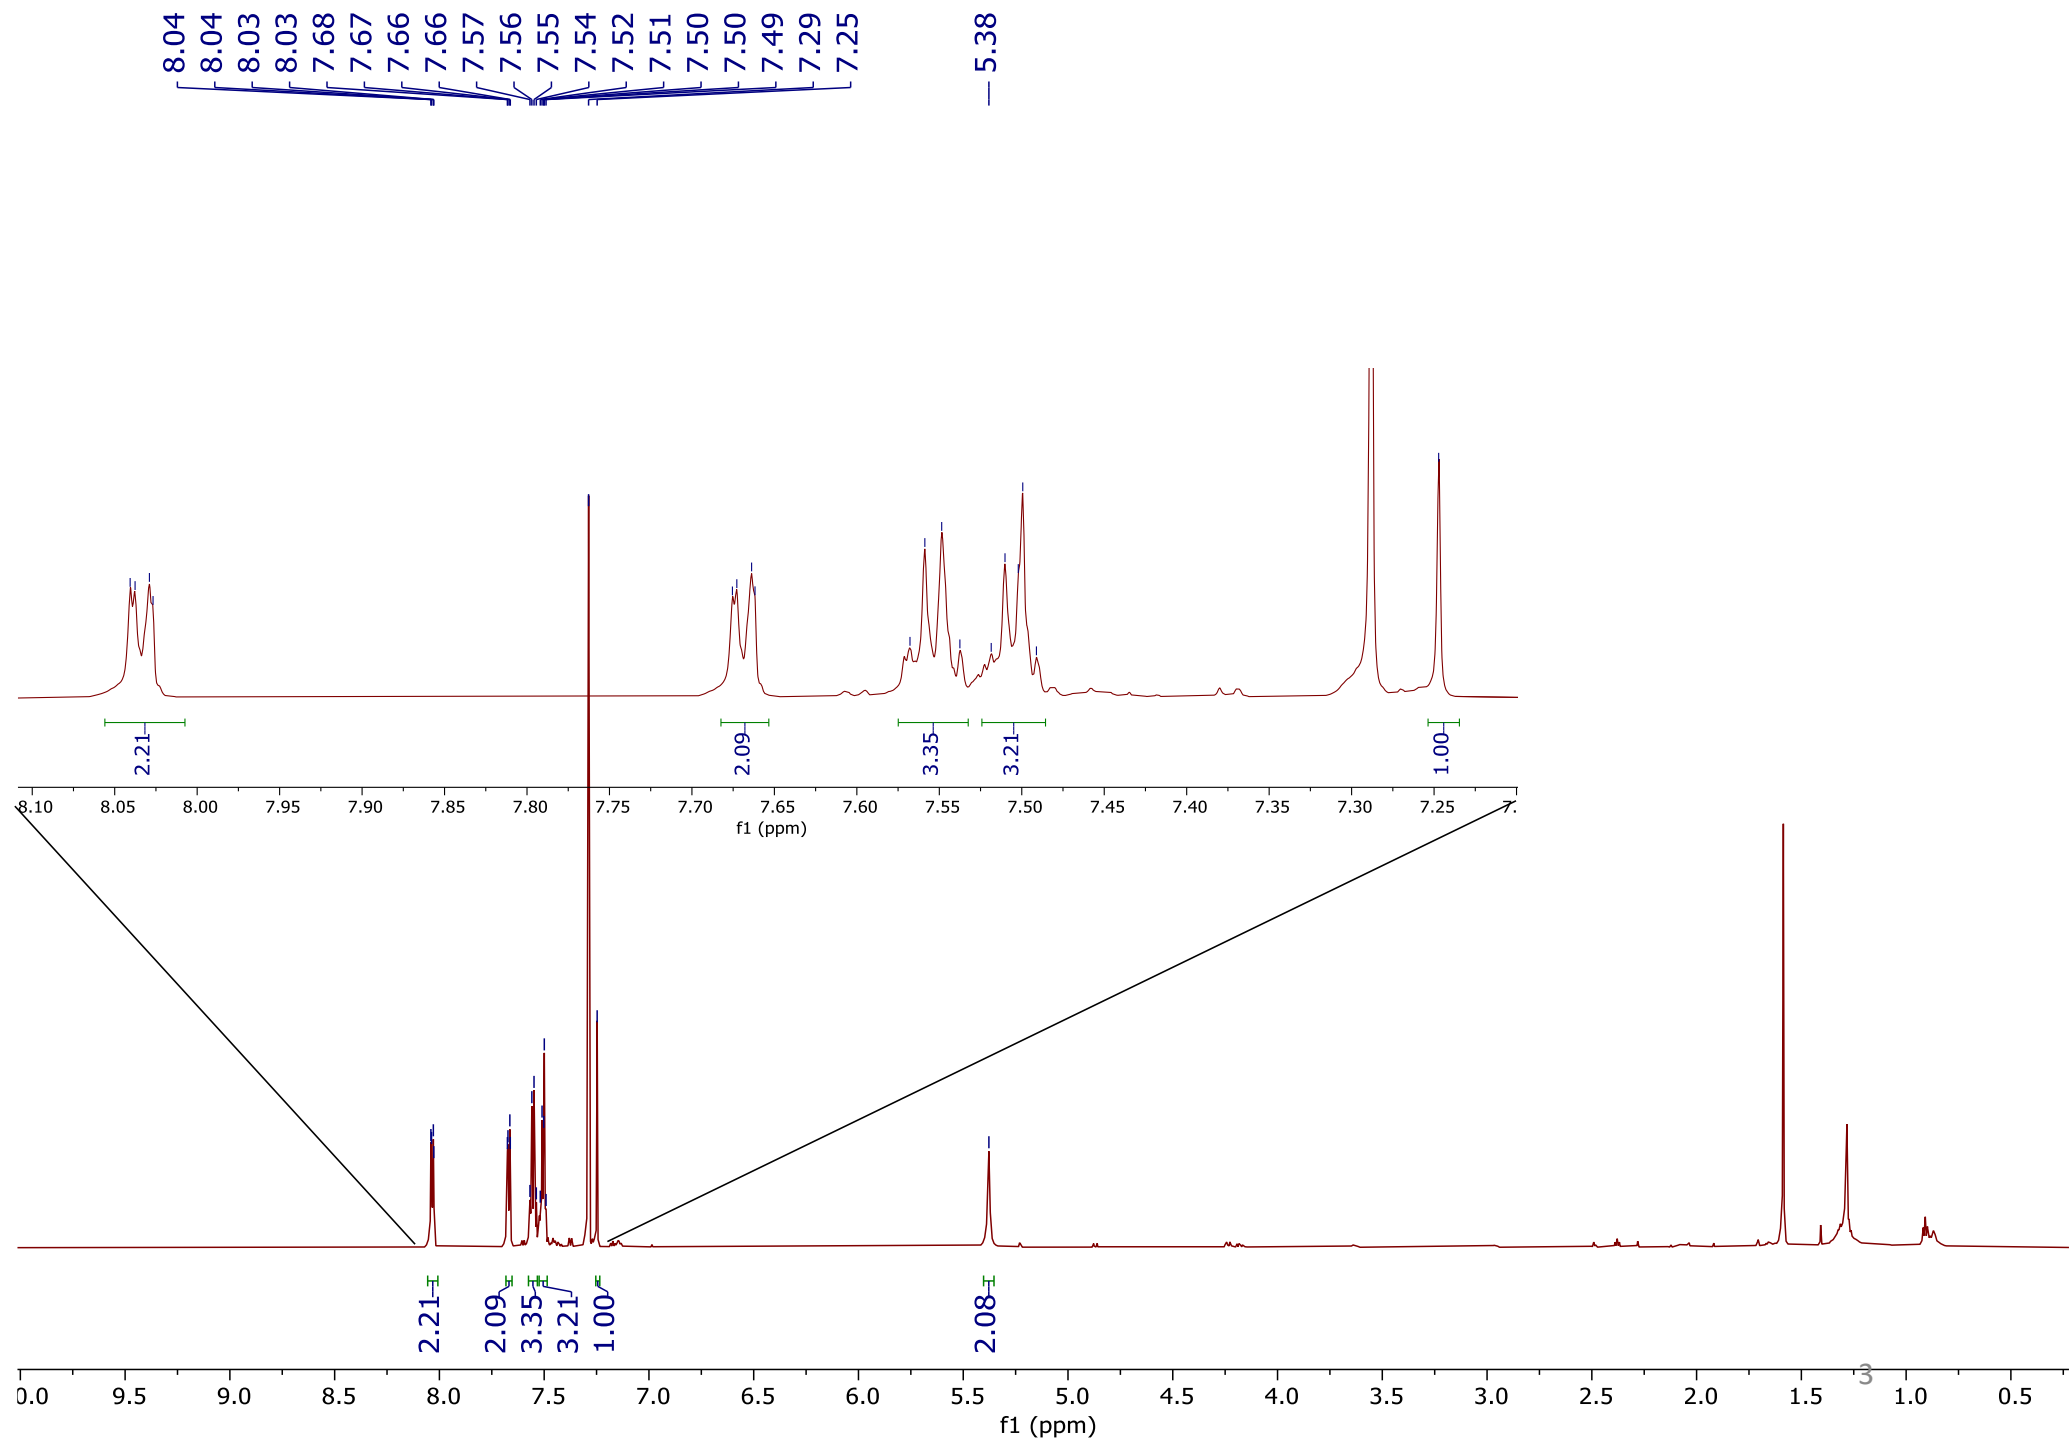

# <sup>13</sup>C-NMR of **1**

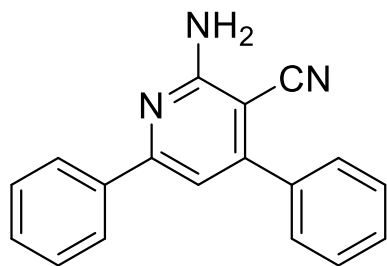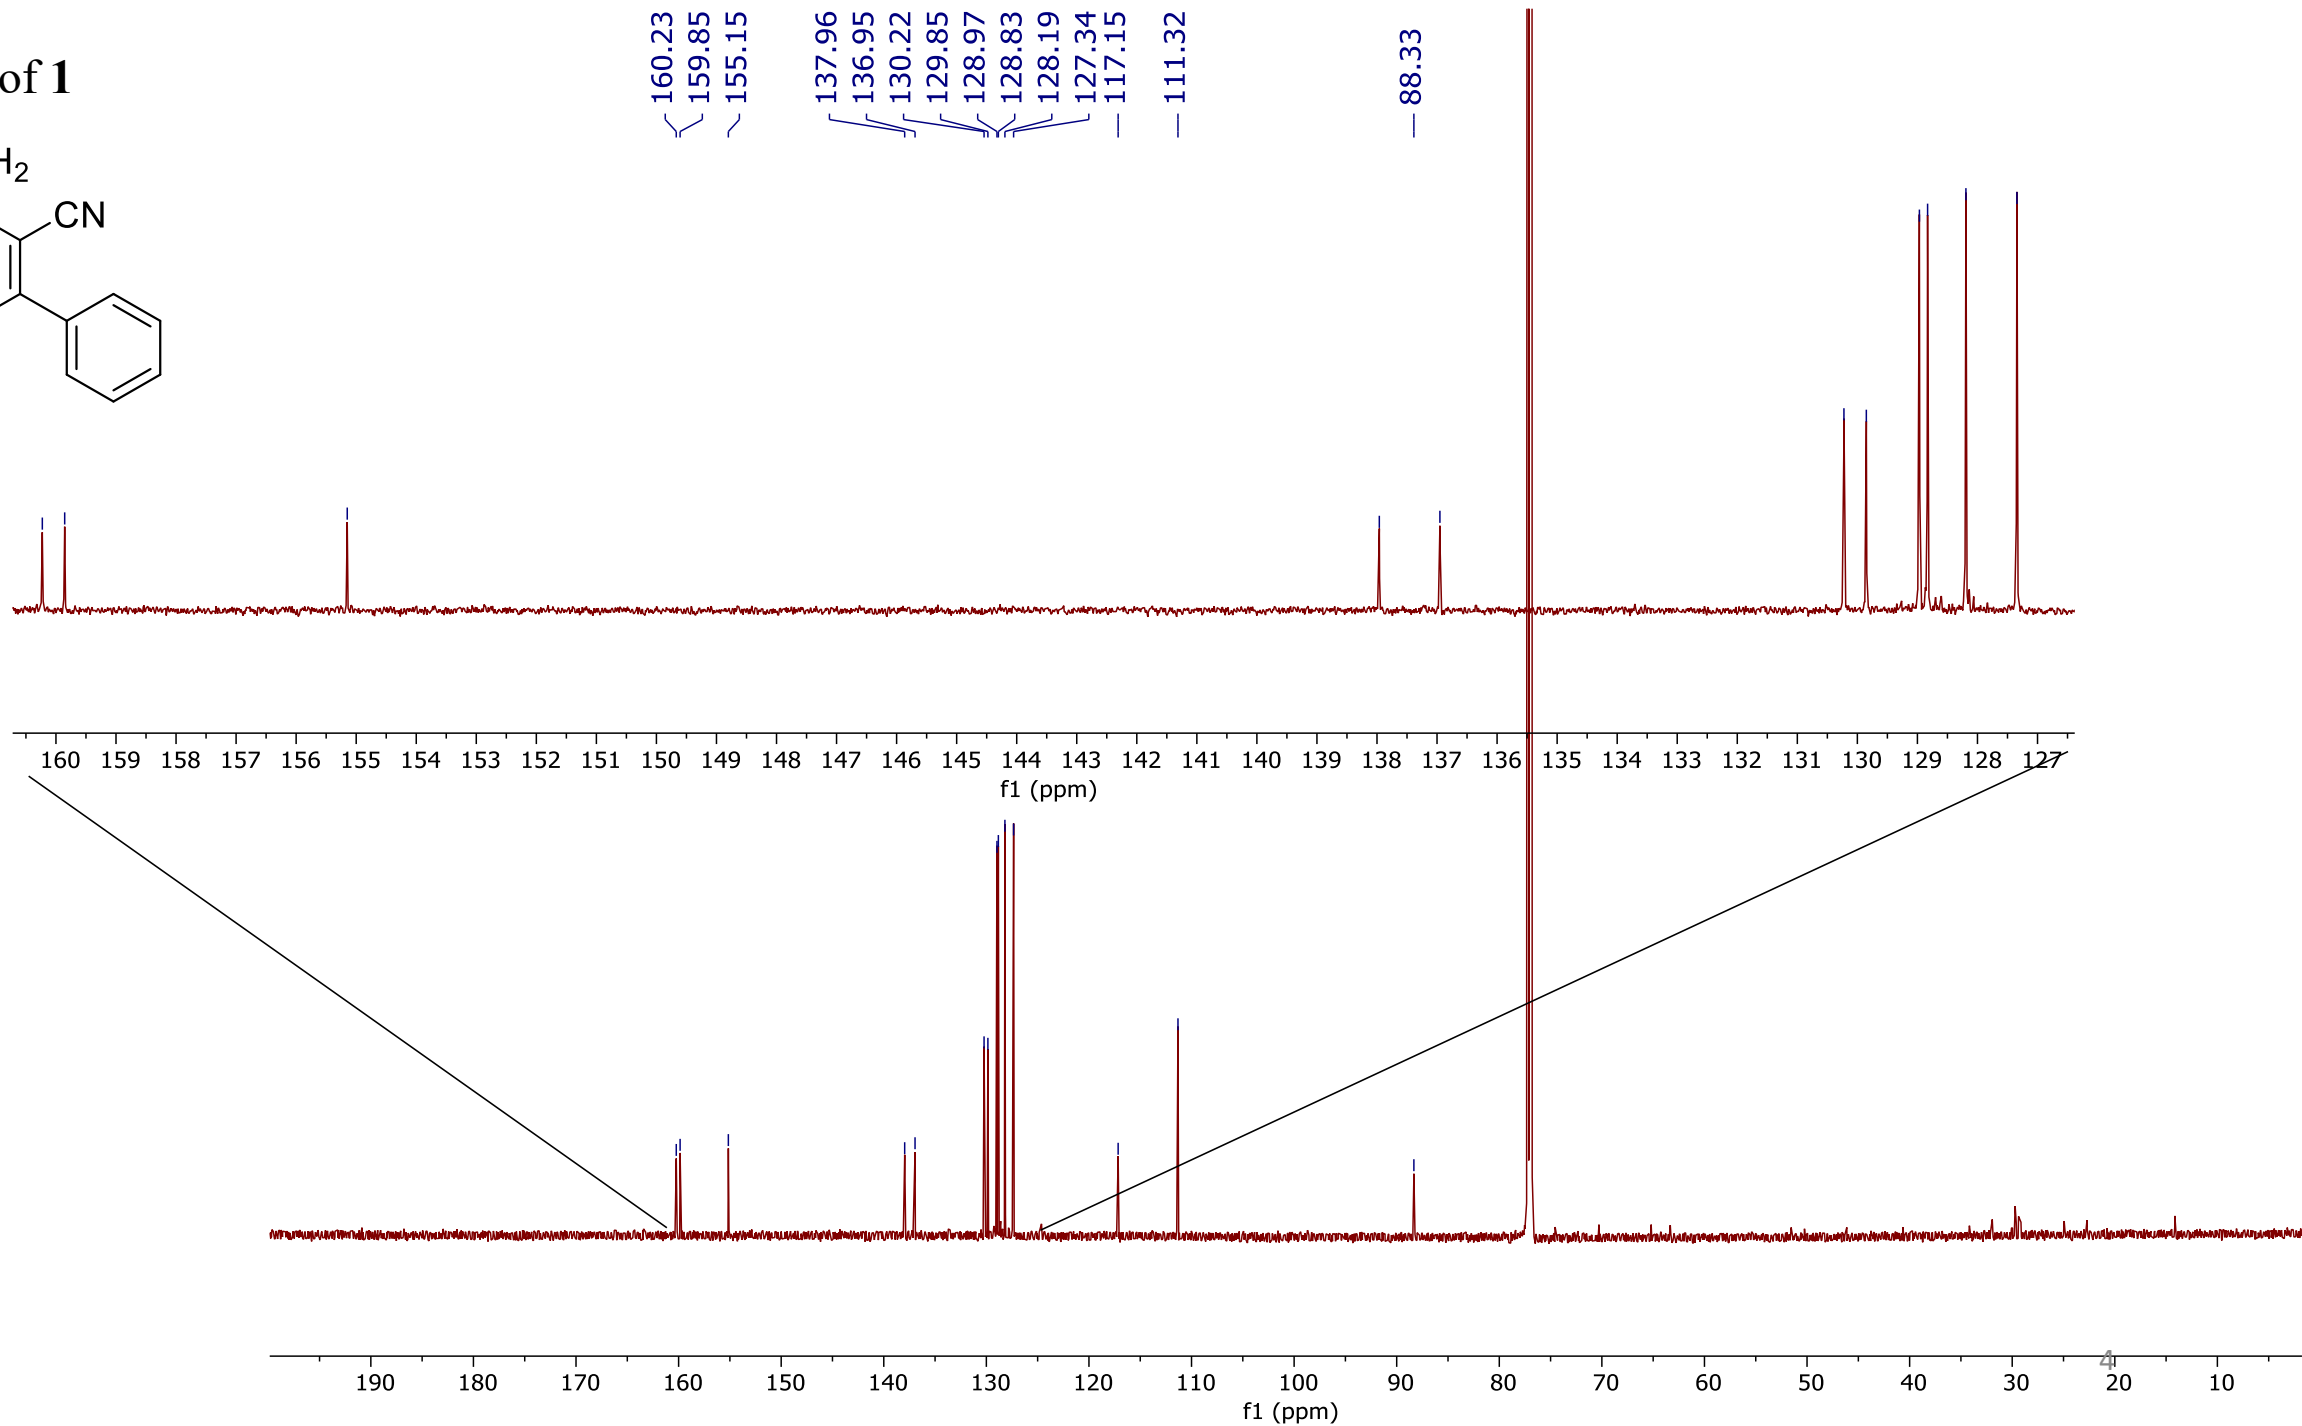

# Mass Spectra of **1**

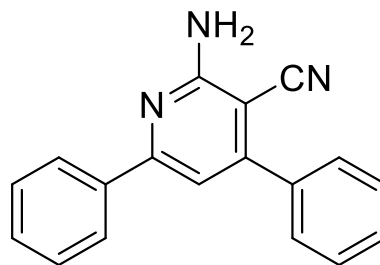

Exact Mass = 271.1109

$m/z = 271.9693$   $[M+H]^+$ ;  $293.9424$   $[M+Na]^+$

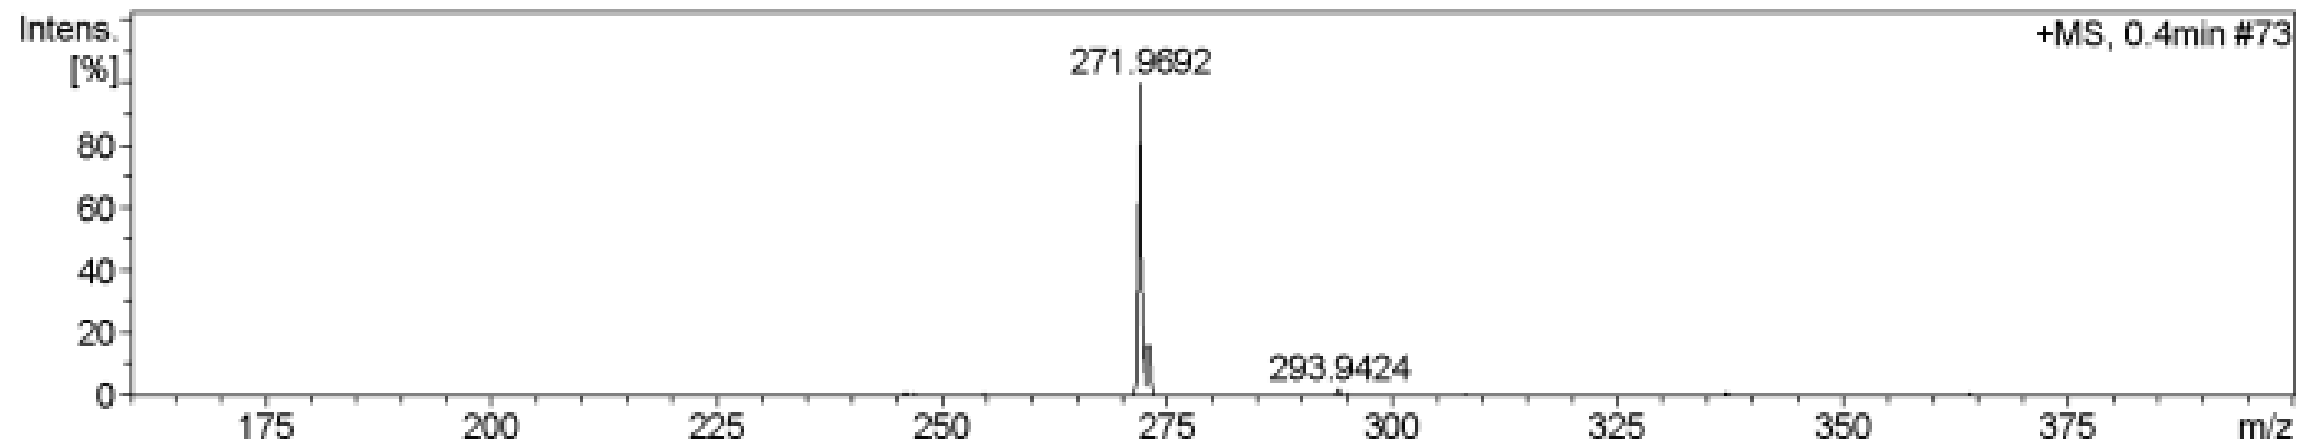

# <sup>1</sup>H-NMR of 2

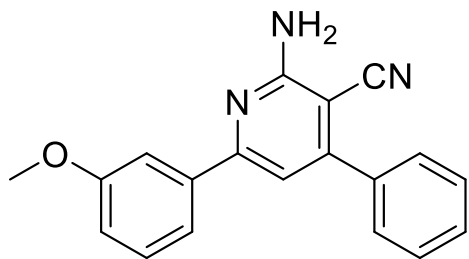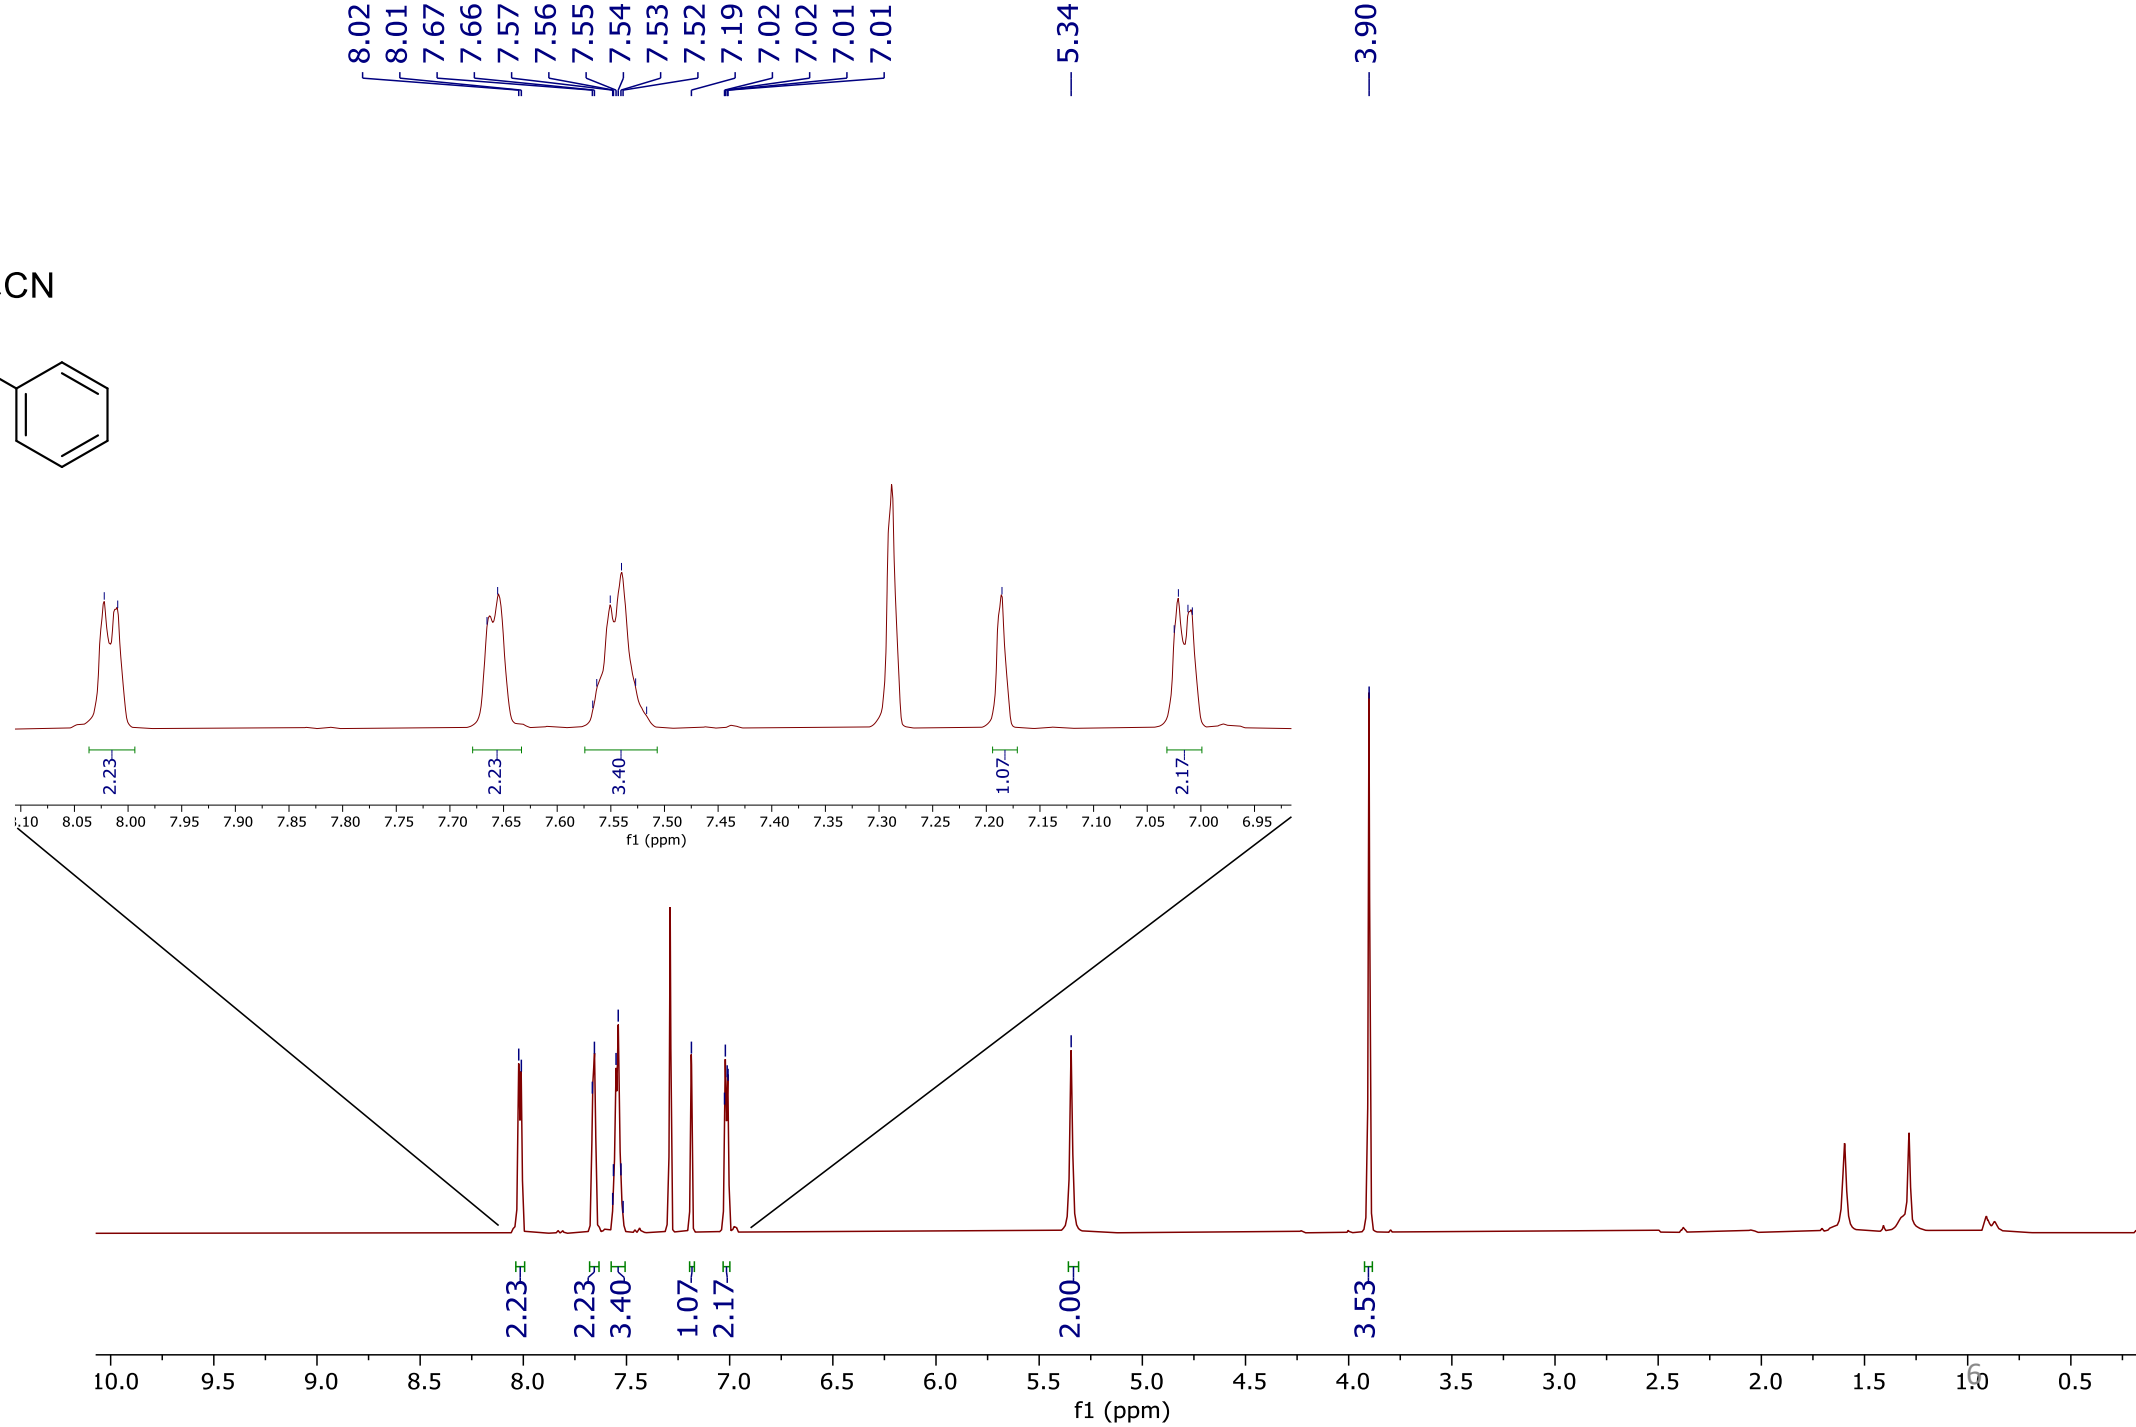

<sup>13</sup>C-NMR of **2**

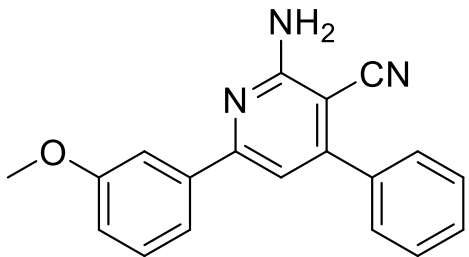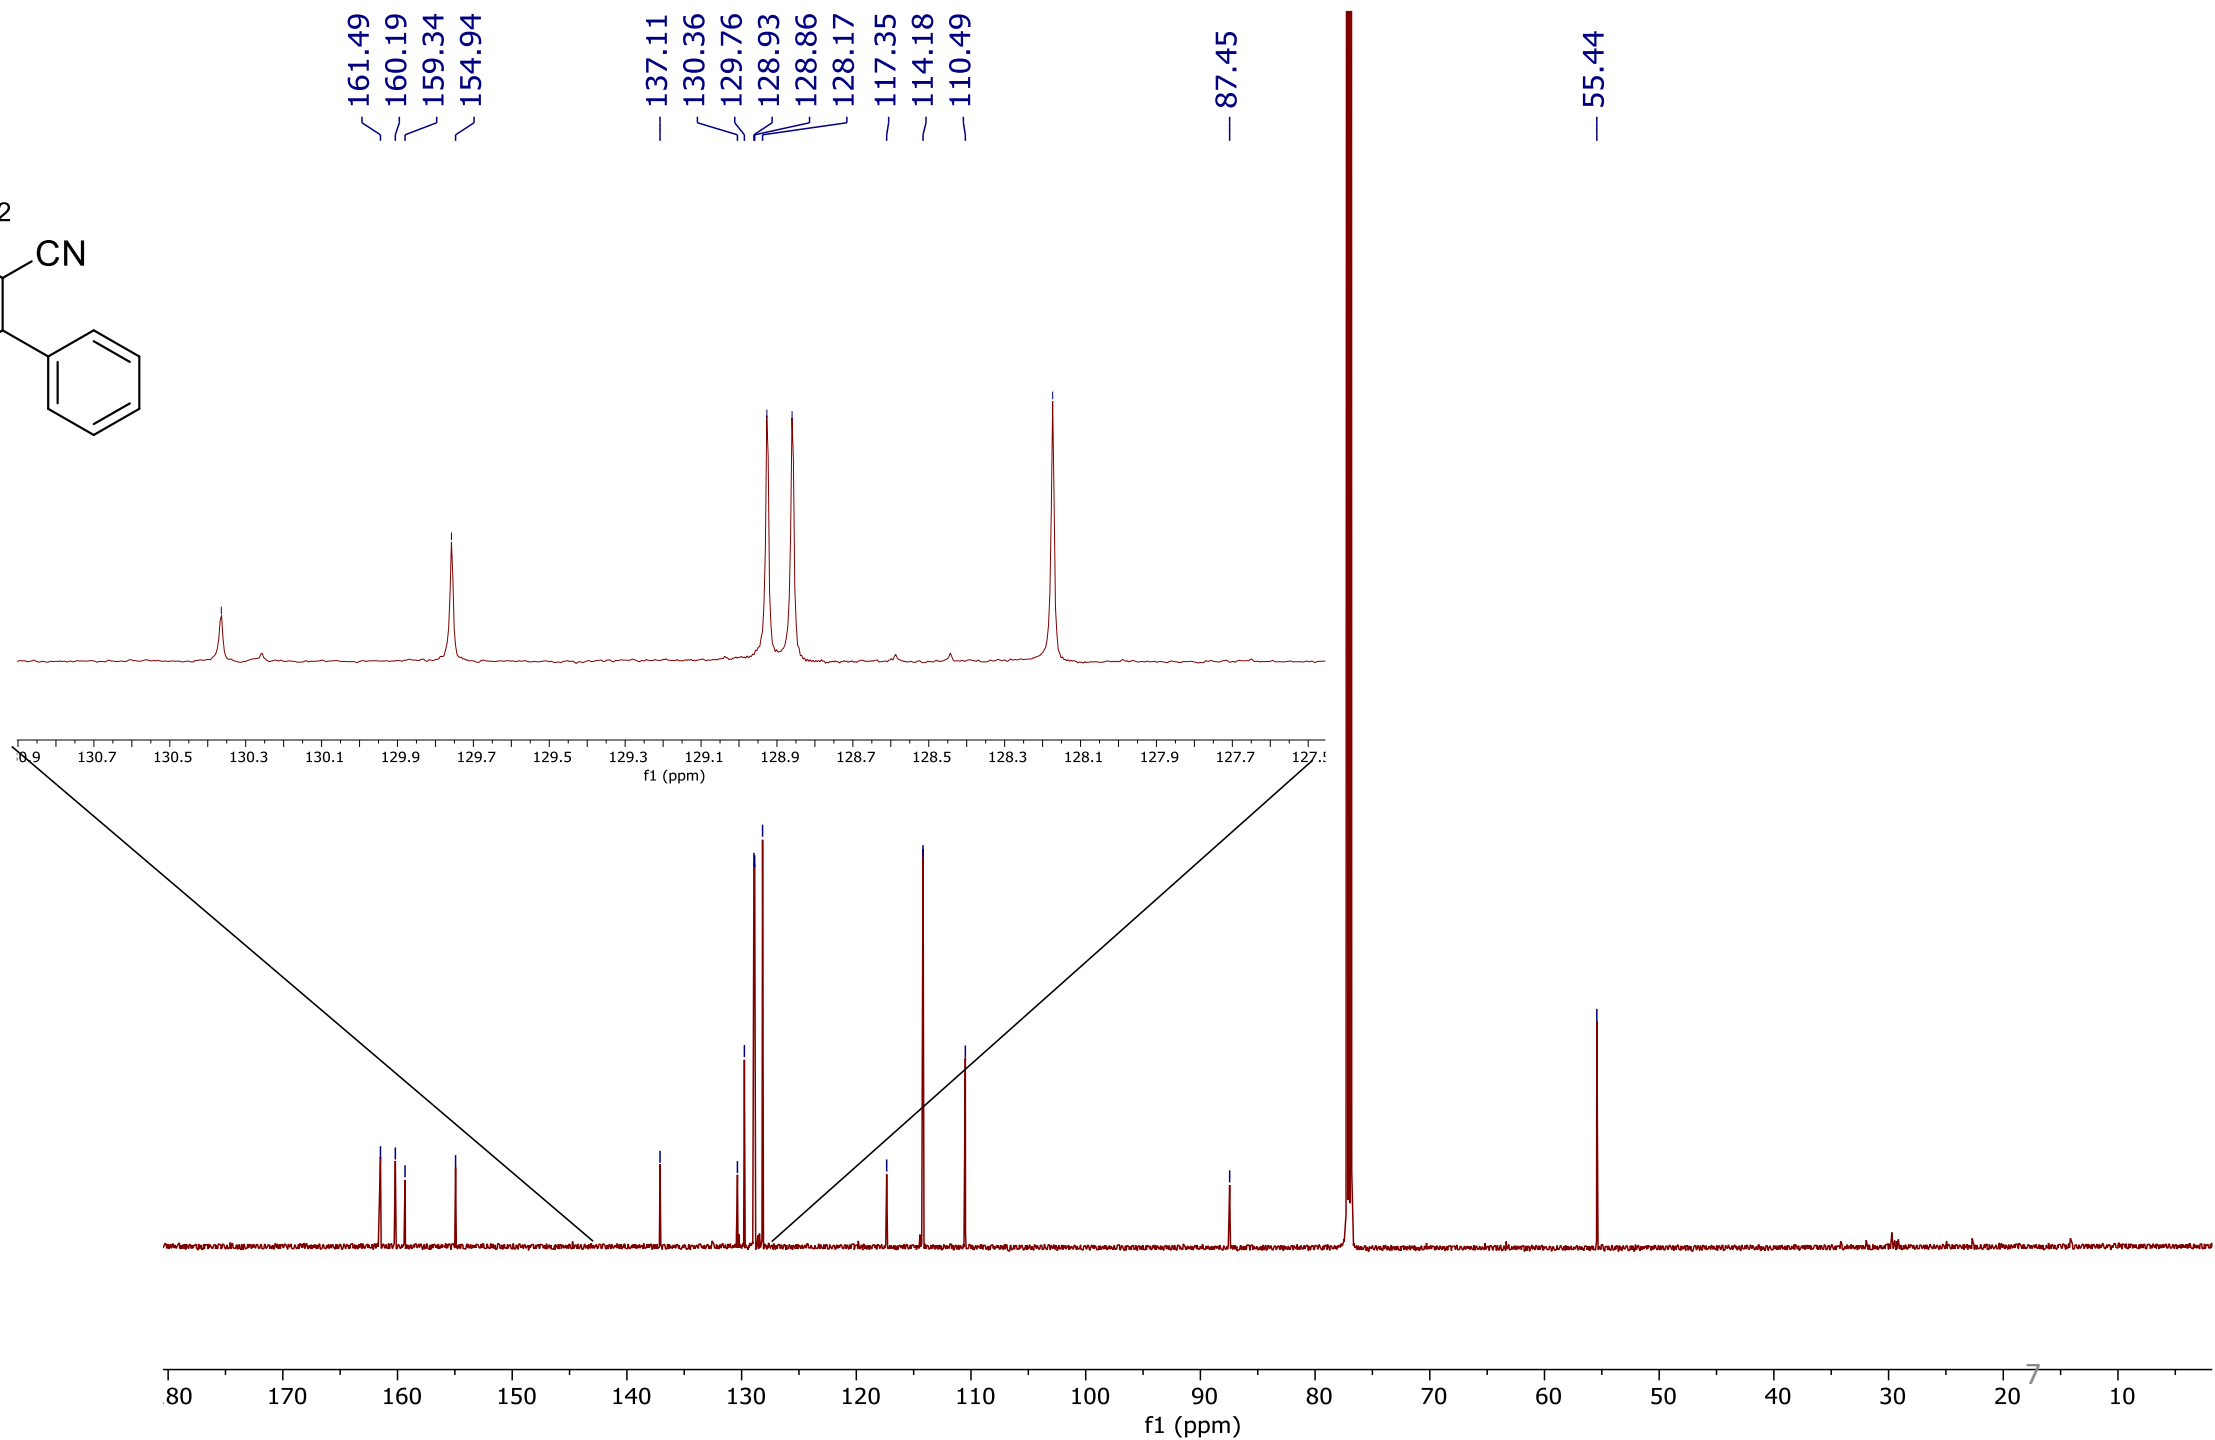

## Mass Spectra of **2**

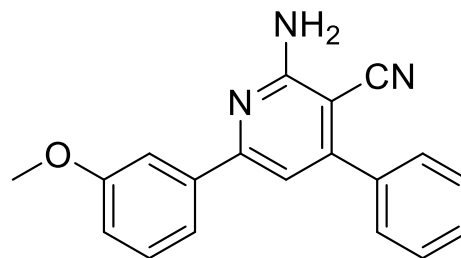

Exact Mass = 301.1215

$m/z = 302.0671$   $[M+H]^+$ ;  $324.0705$   $[M+Na]^+$

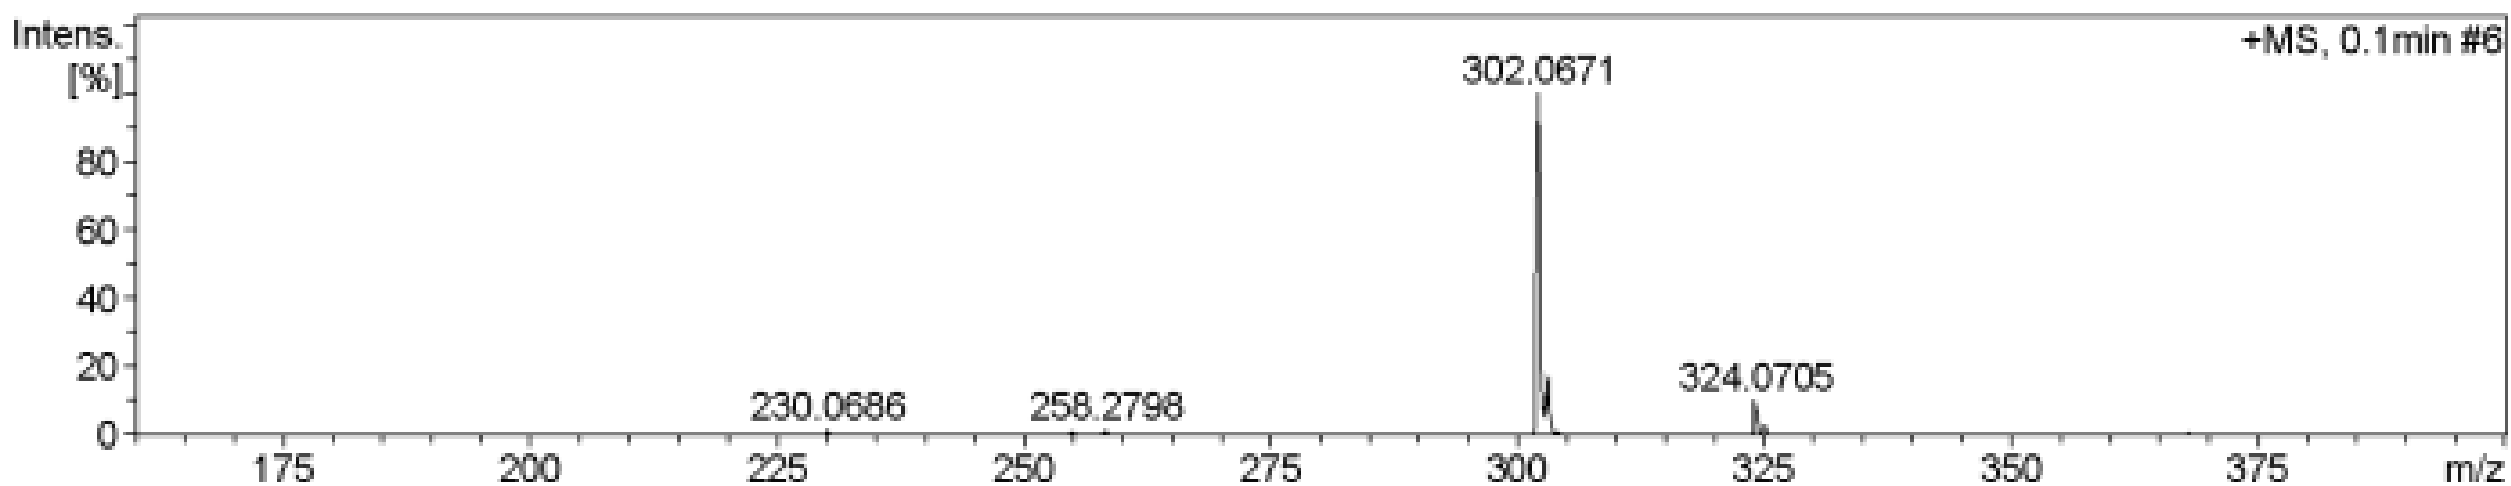



# <sup>1</sup>H-NMR of 3

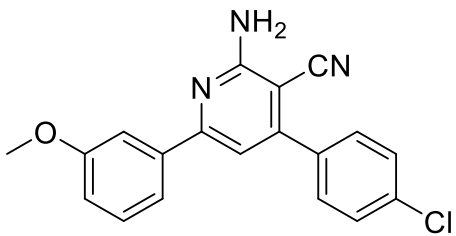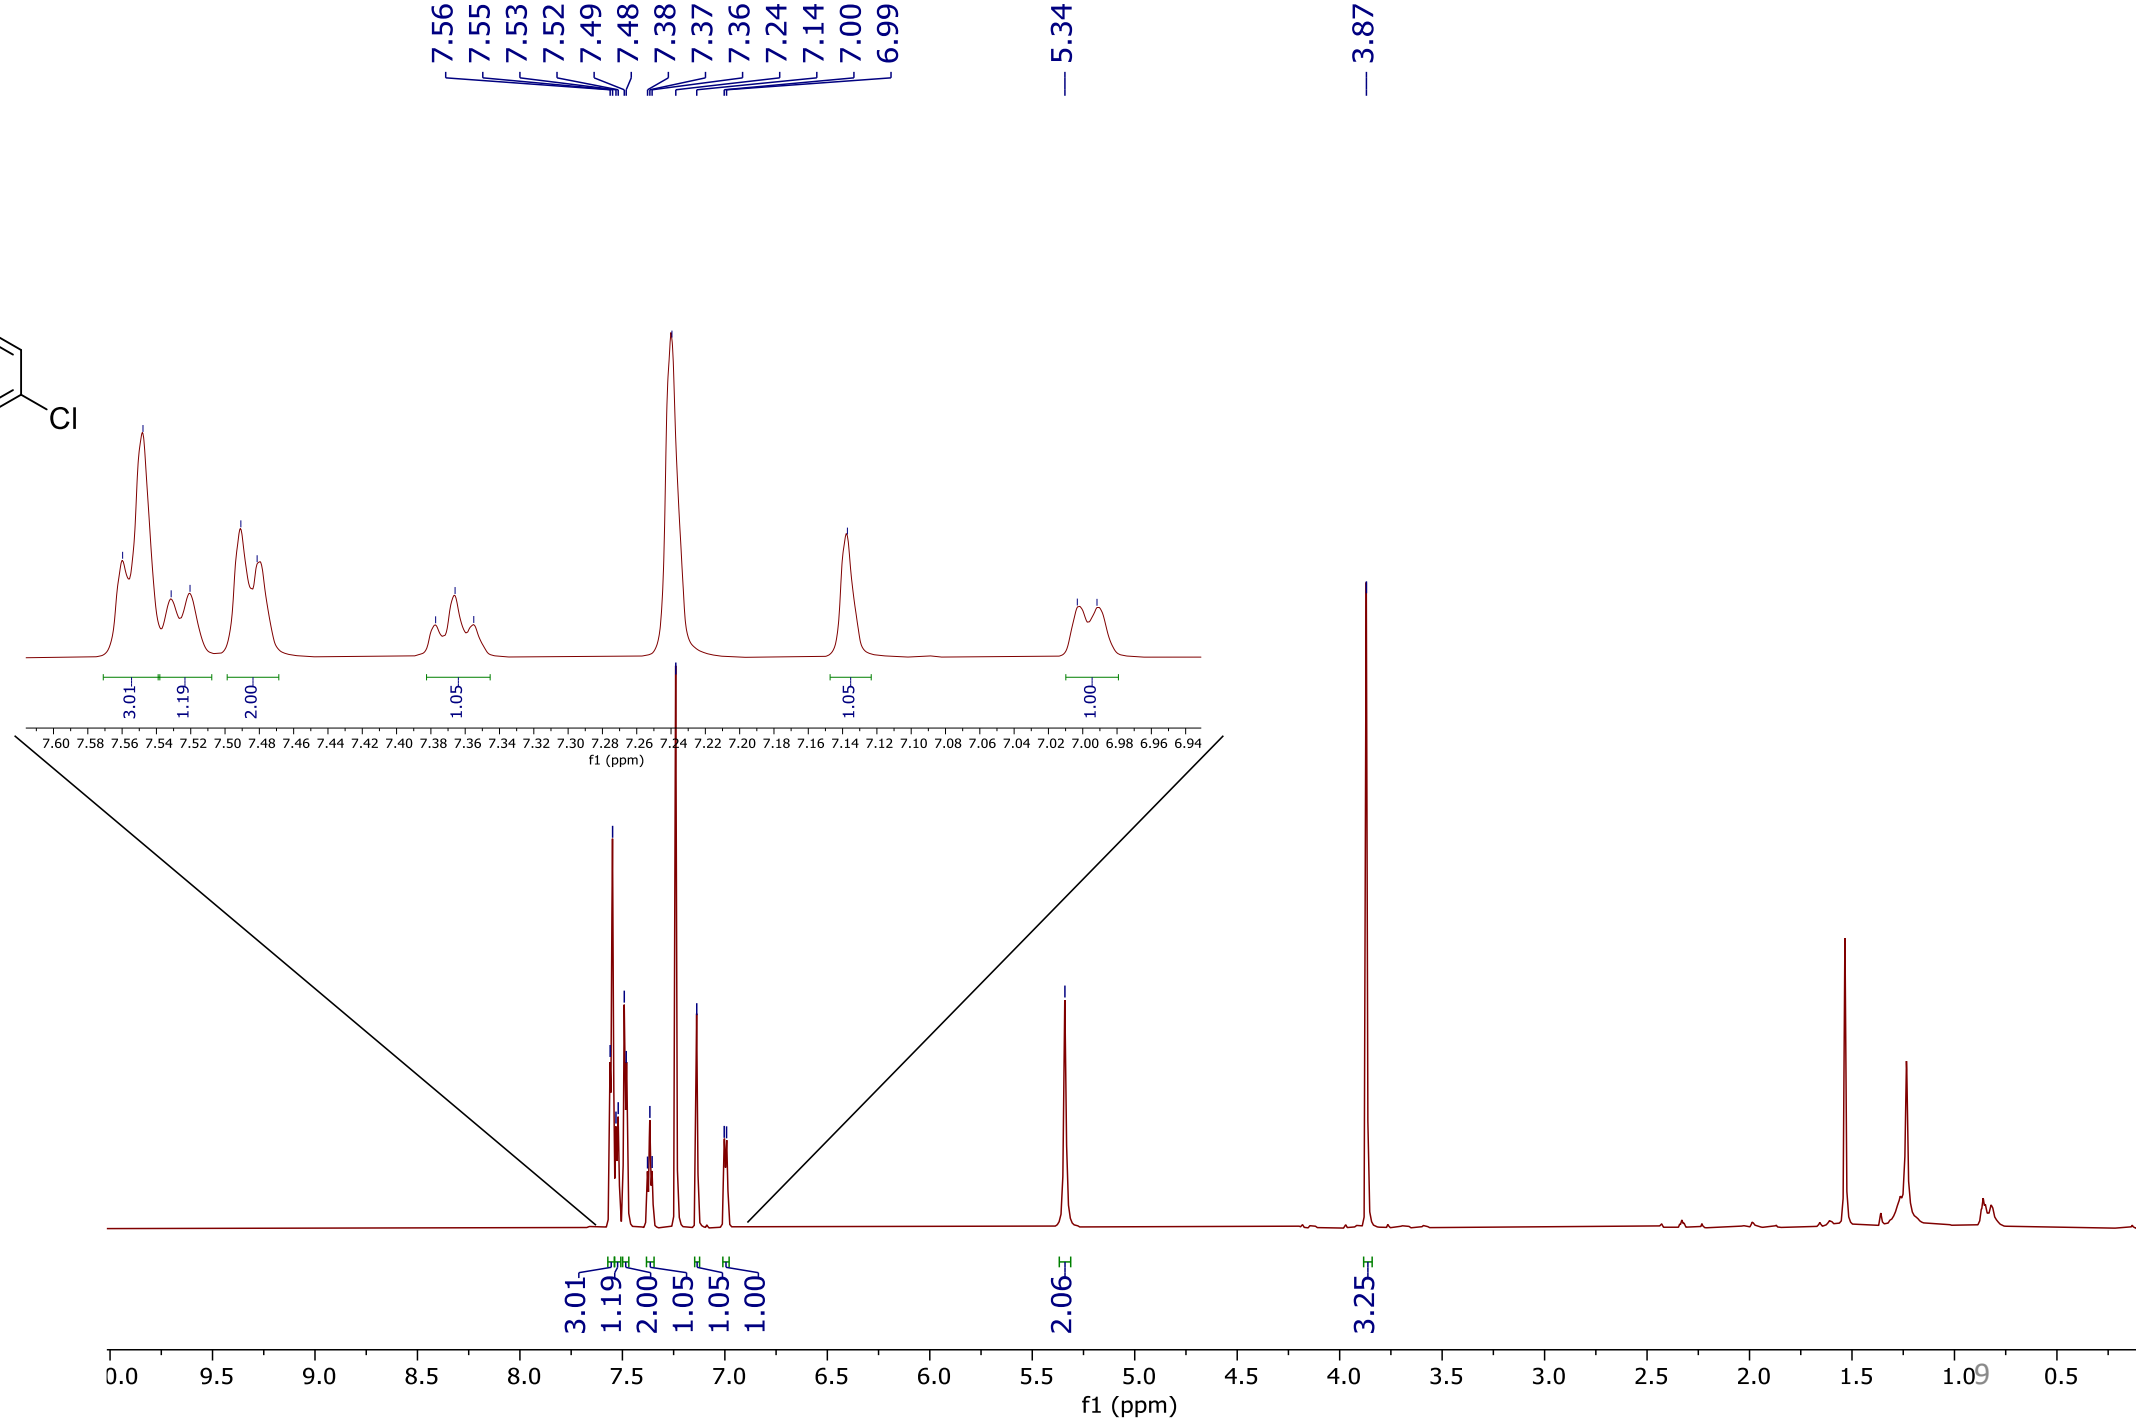

# <sup>13</sup>C-NMR of **3**

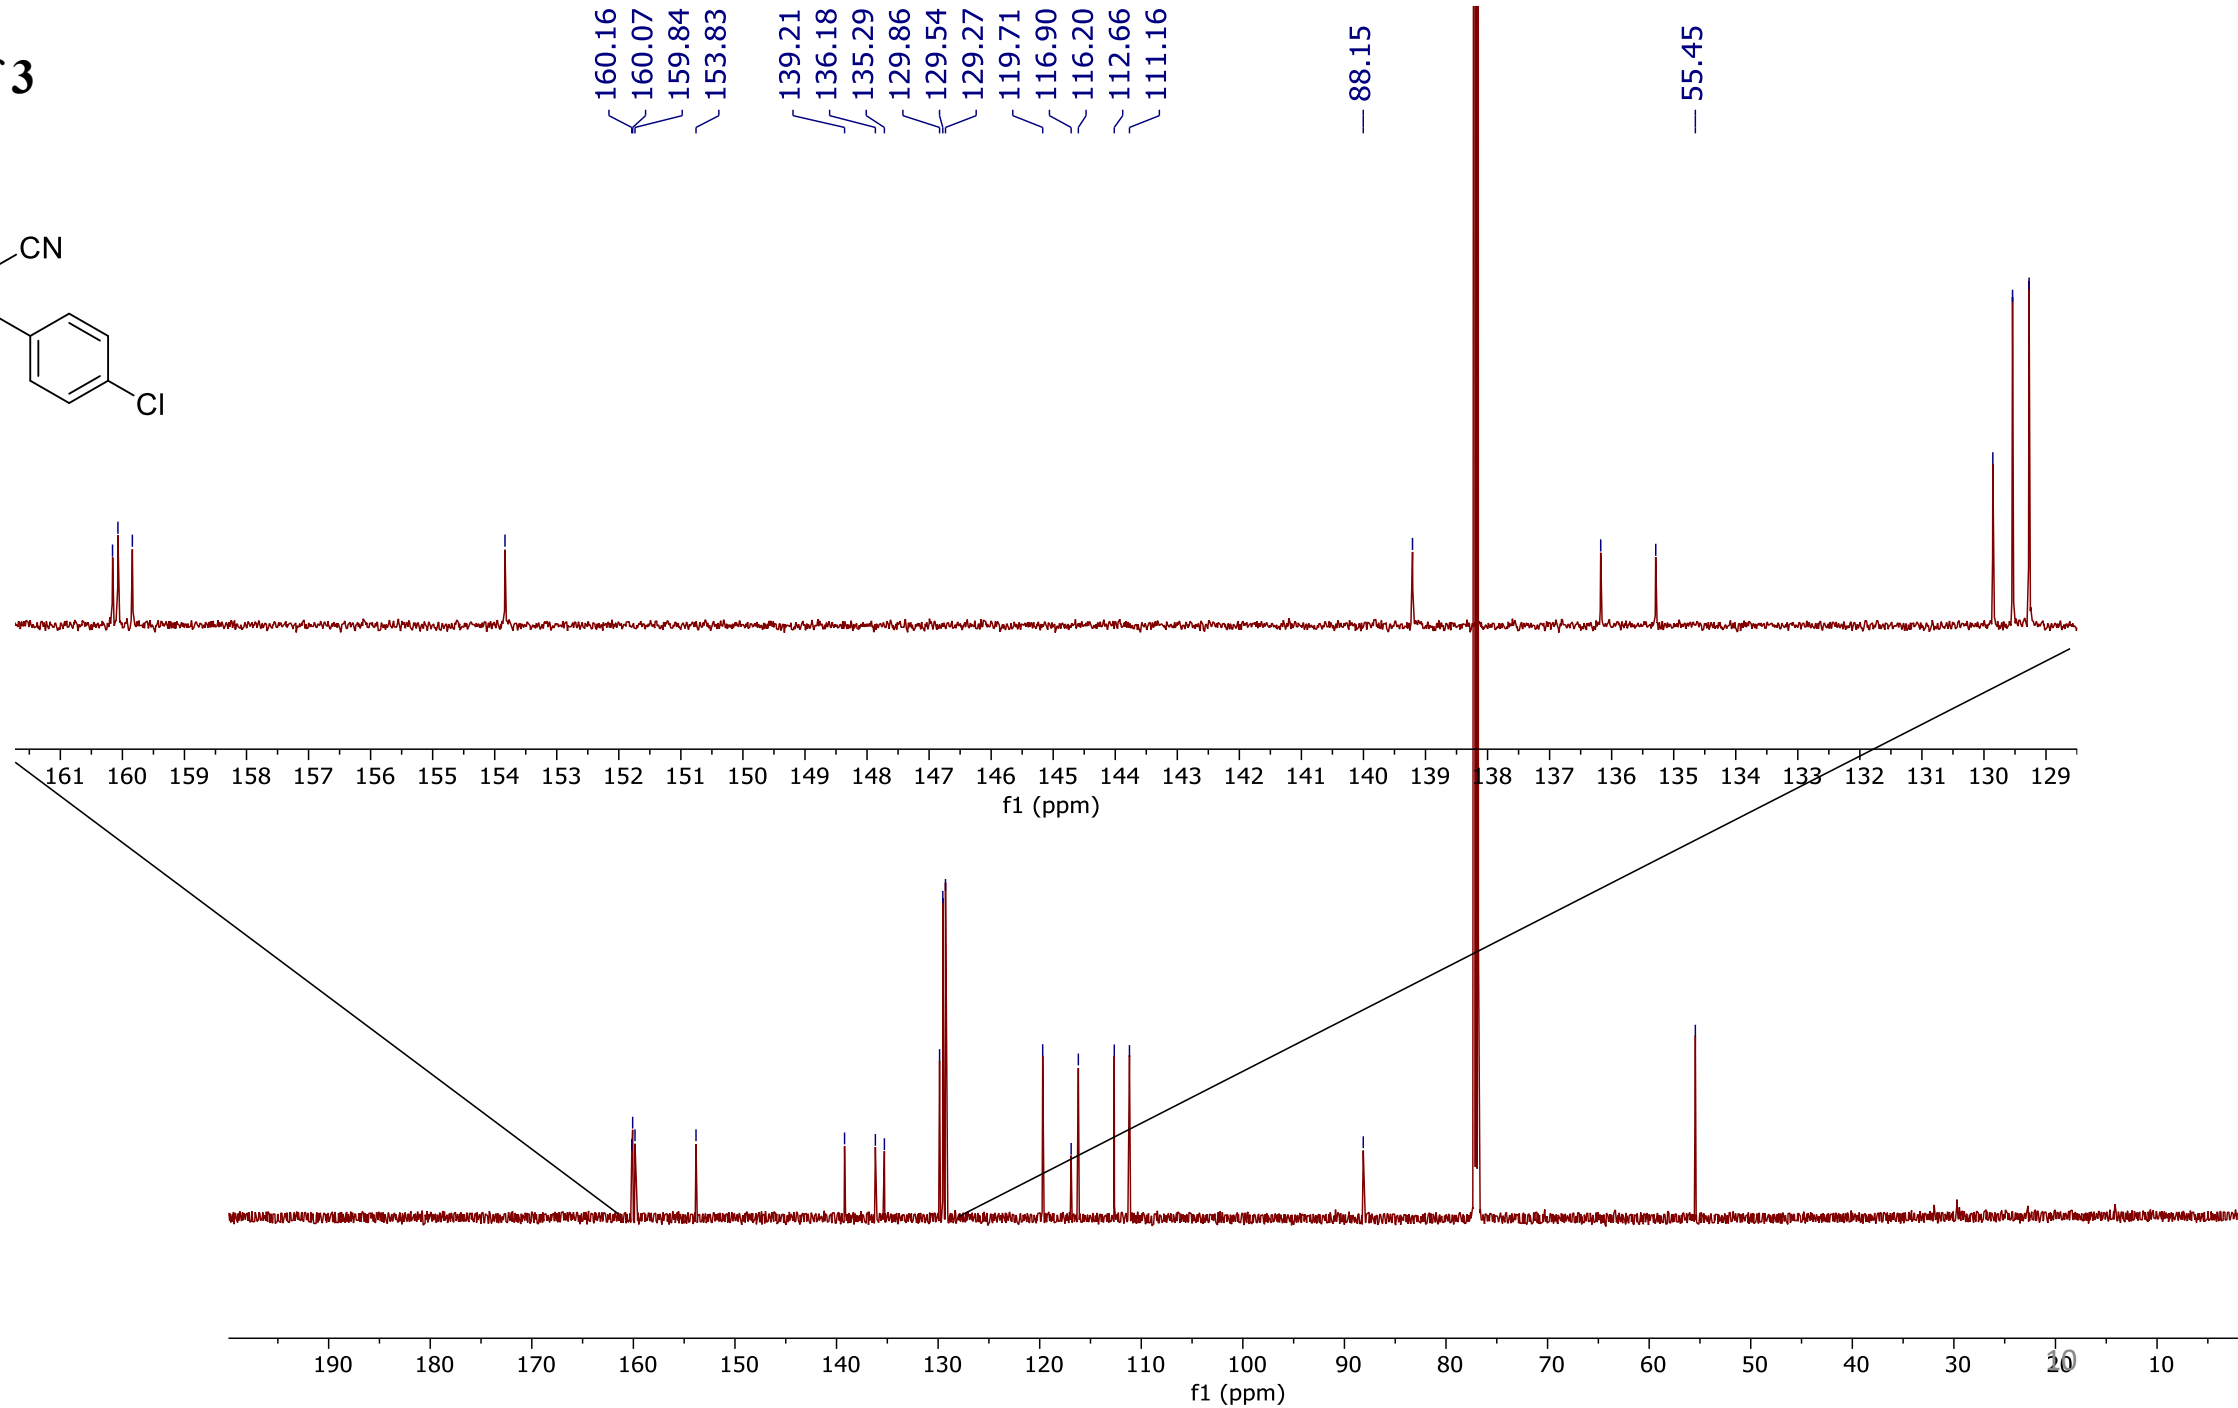

Mass Spectra of 3

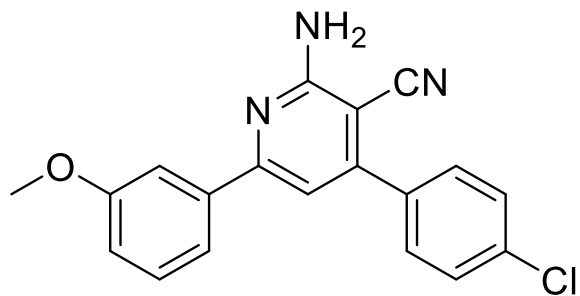

Exact Mass = 335.0825  
 $m/z$  336.0031  $[M(^{35}\text{Cl})+H]^+$ ; 338.0375  $[M(^{37}\text{Cl})+H]^+$ .

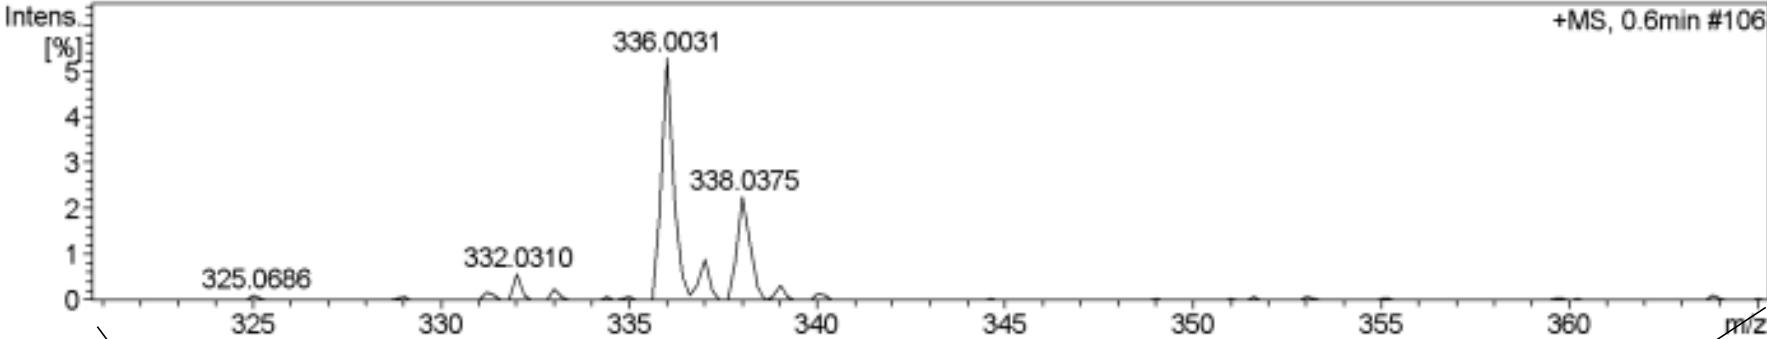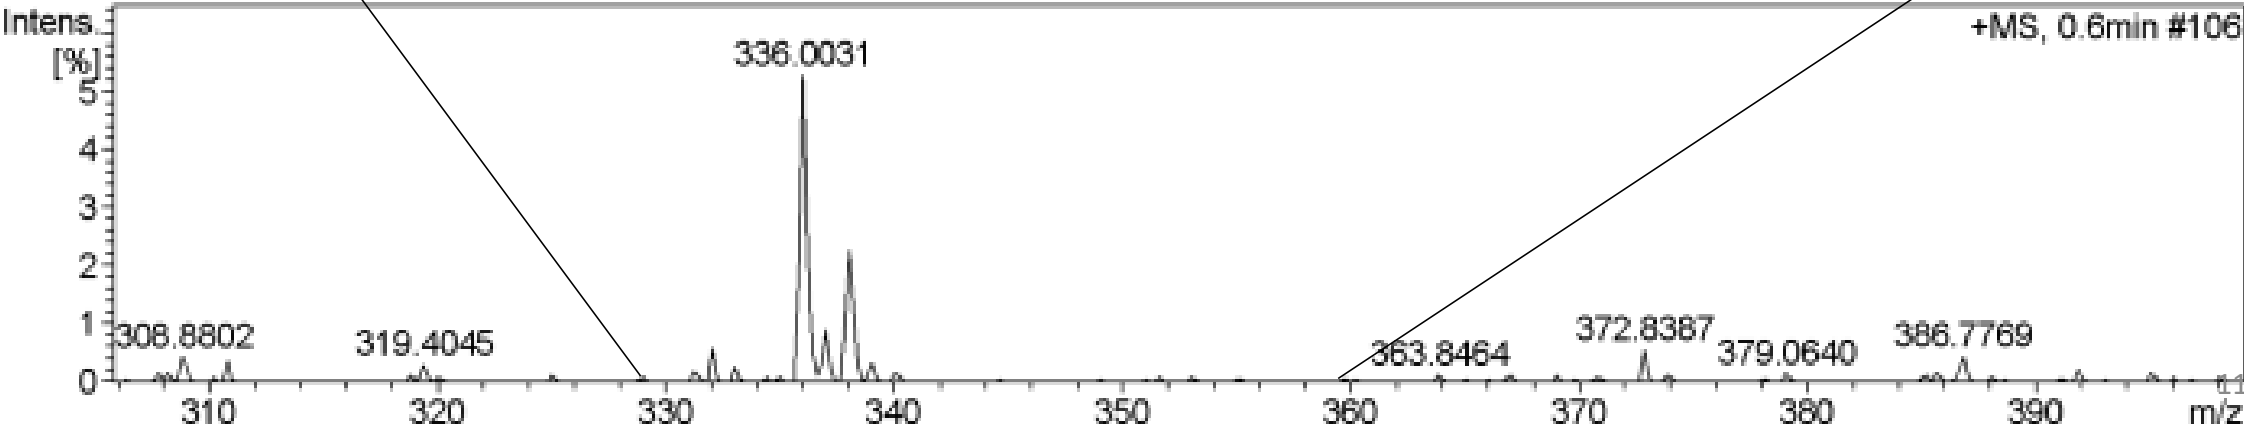

# <sup>1</sup>H-NMR of 4

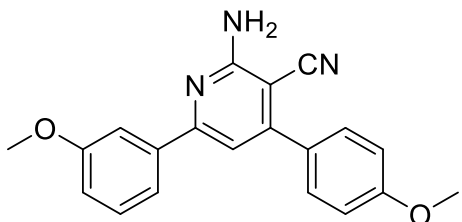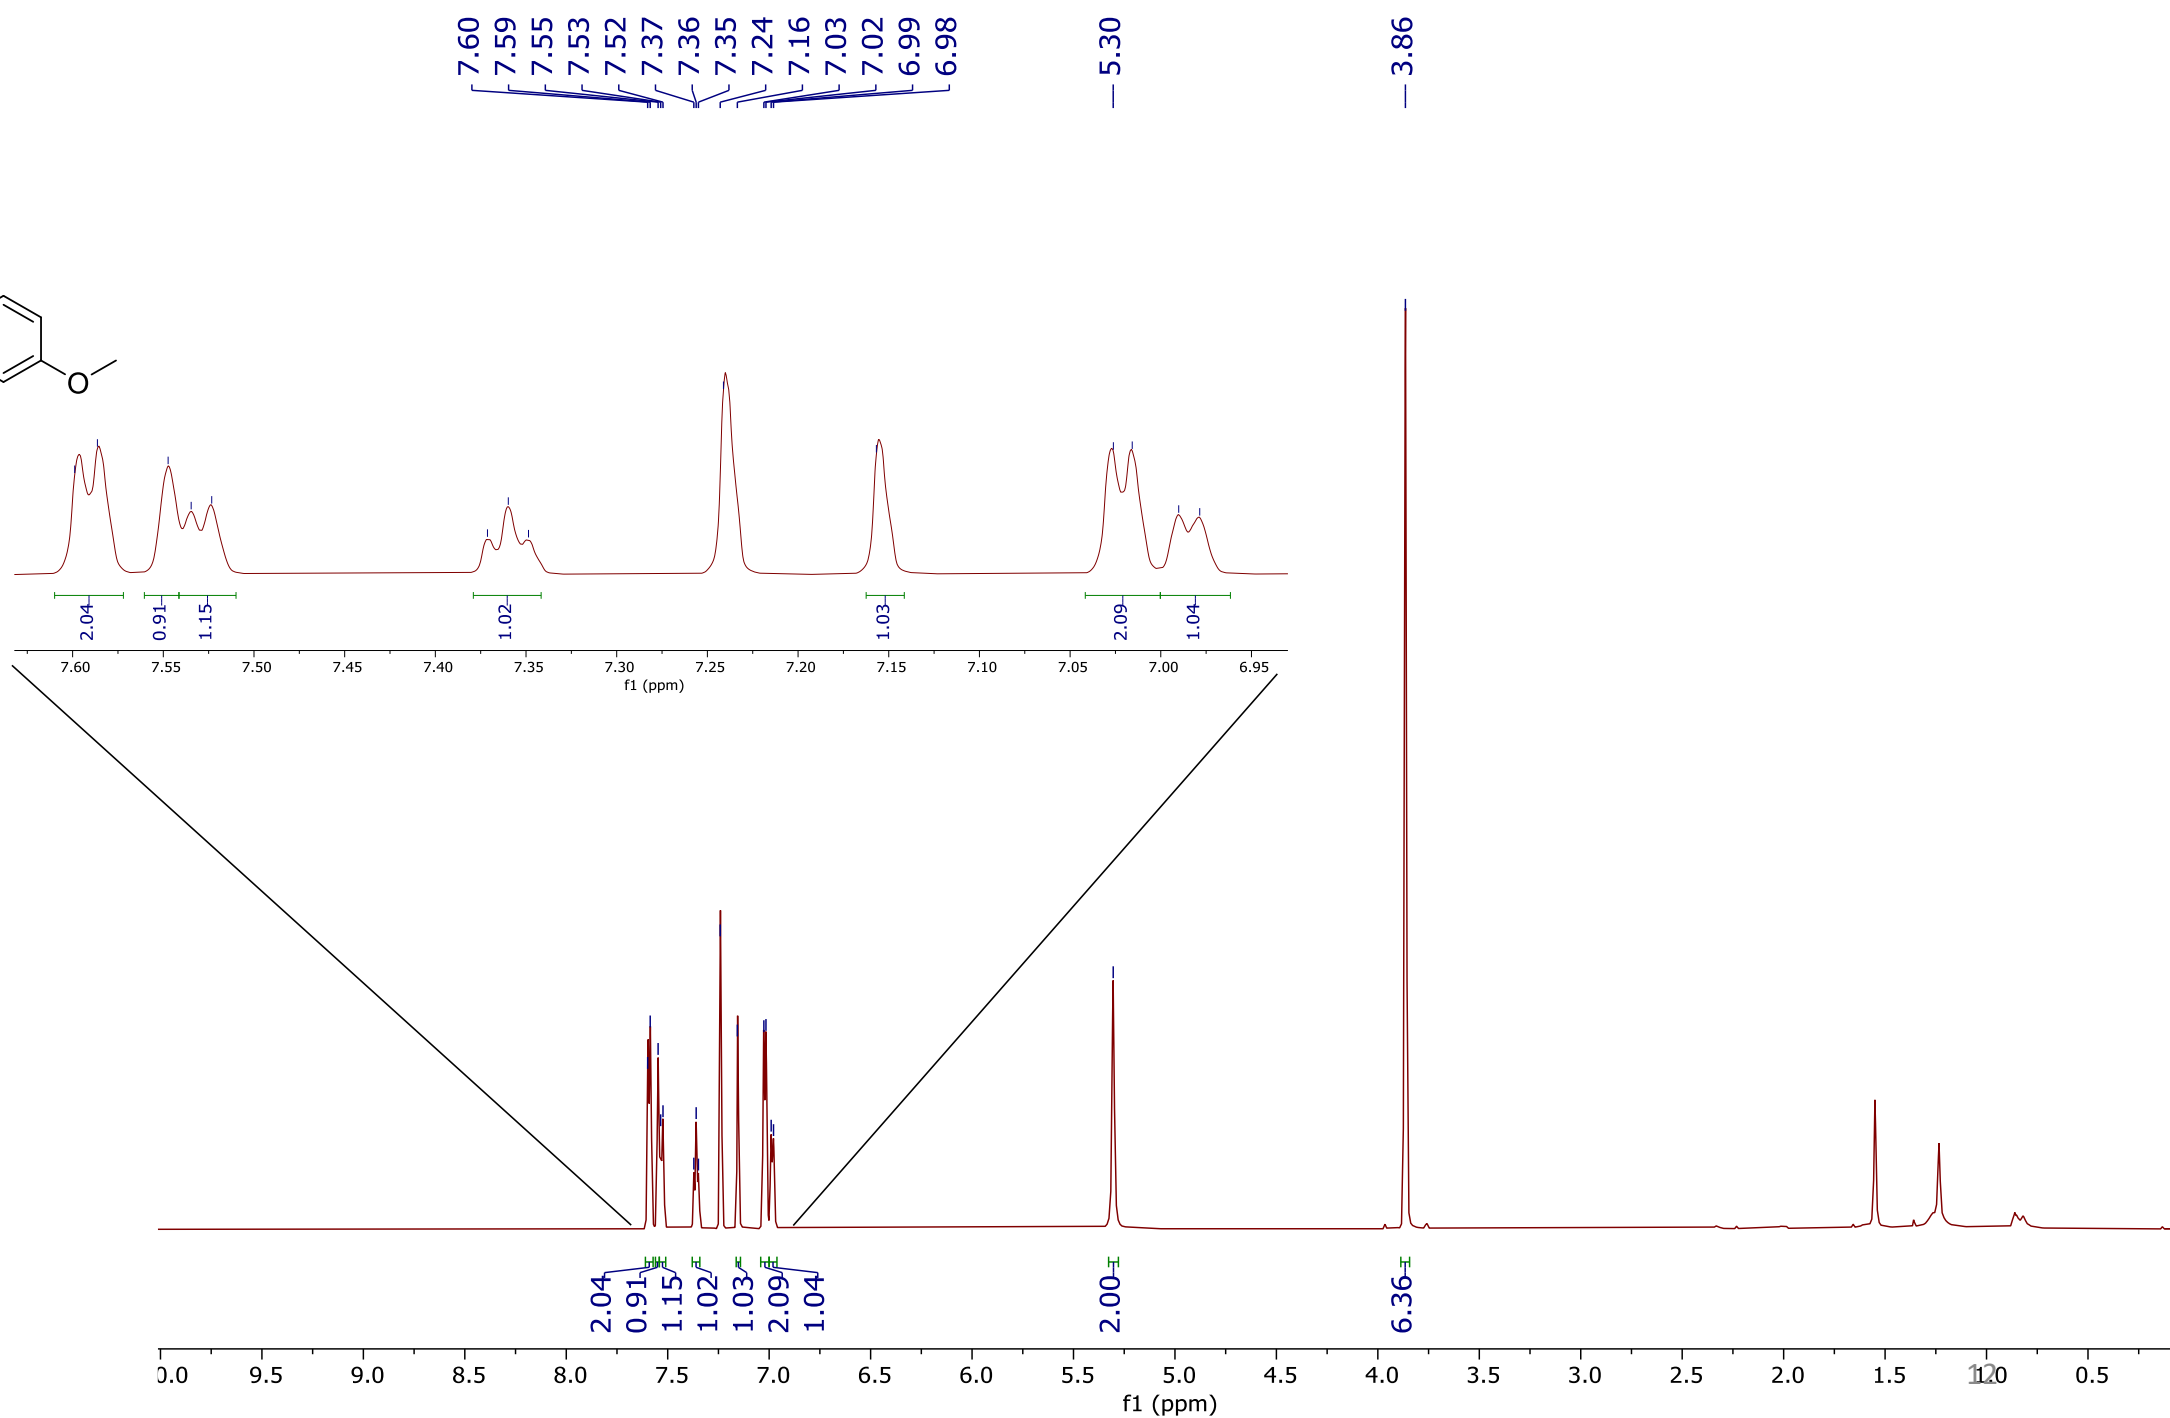

# <sup>13</sup>C-NMR of **4**

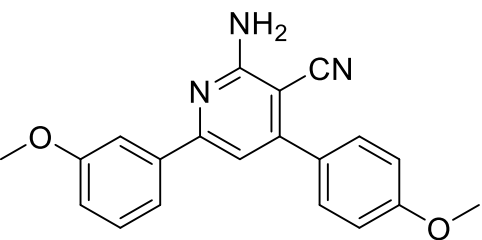

161.01  
160.26  
160.04  
159.48  
154.72  
— 139.55  
129.80  
129.65  
129.16  
119.71  
117.47  
116.03  
114.40  
112.59  
111.21  
— 88.14  
55.45  
55.44

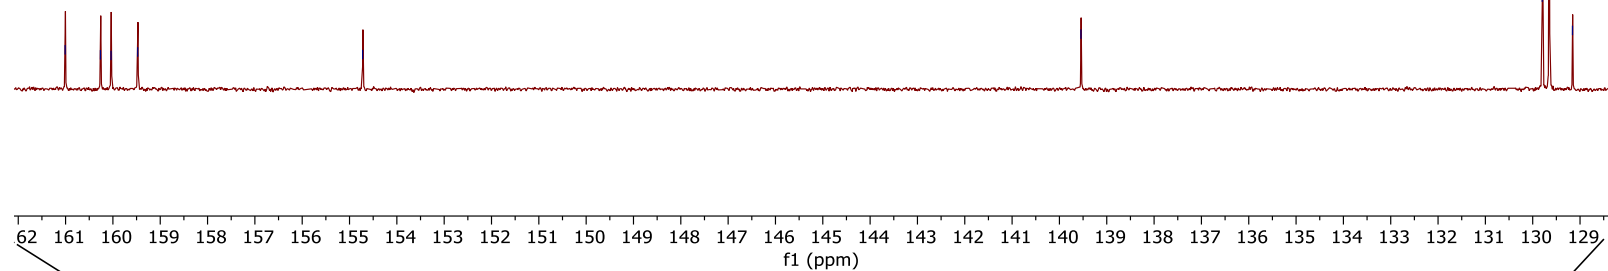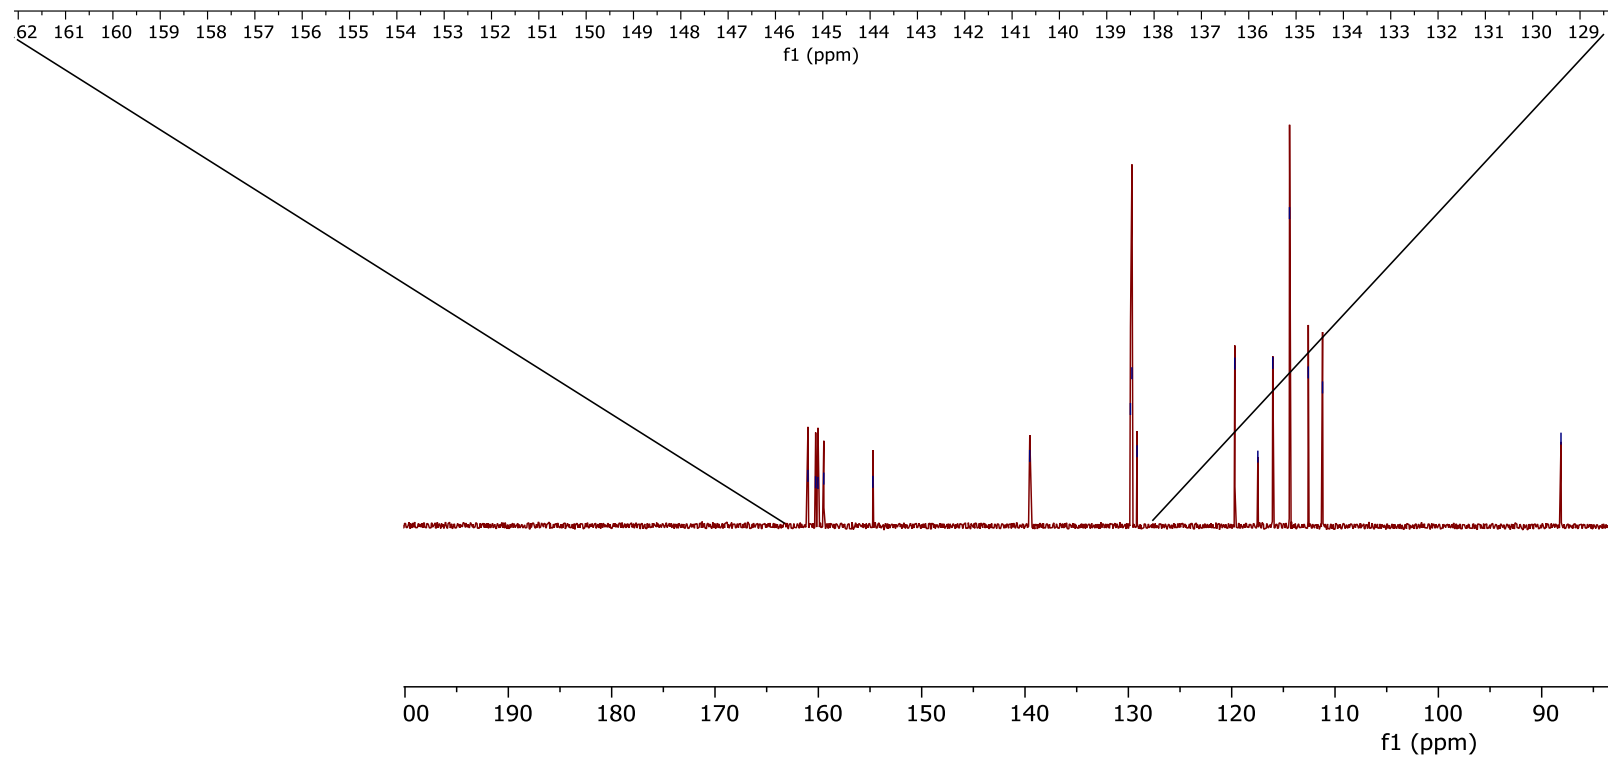

Mass Spectra of 4

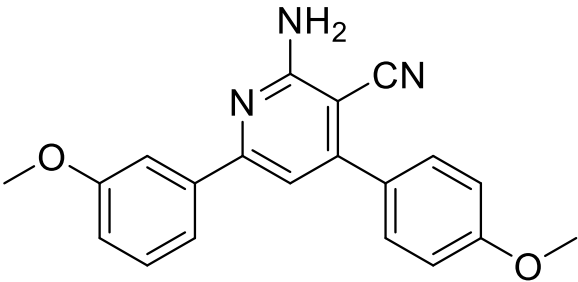

Exact Mass = 331.1321

$m/z = 332.1401$  [M+H]<sup>+</sup>; 354.0757 [M+Na]<sup>+</sup>; 370.0165 [M+K]<sup>+</sup>;

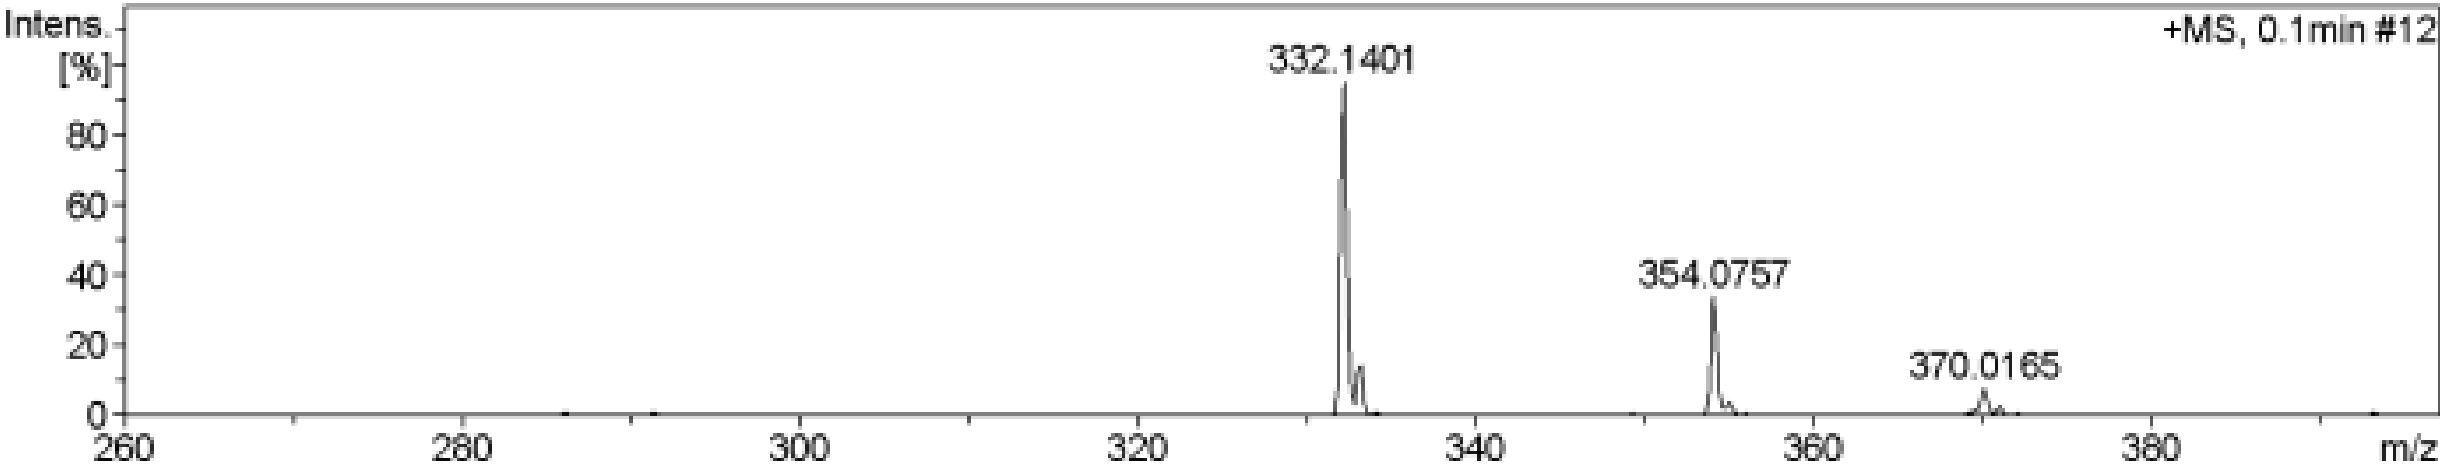

# $^1\text{H}$ -NMR of **5**

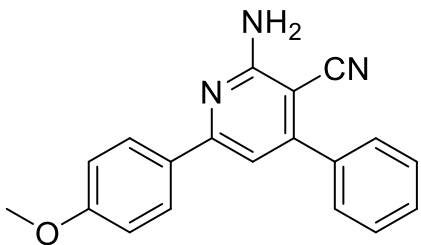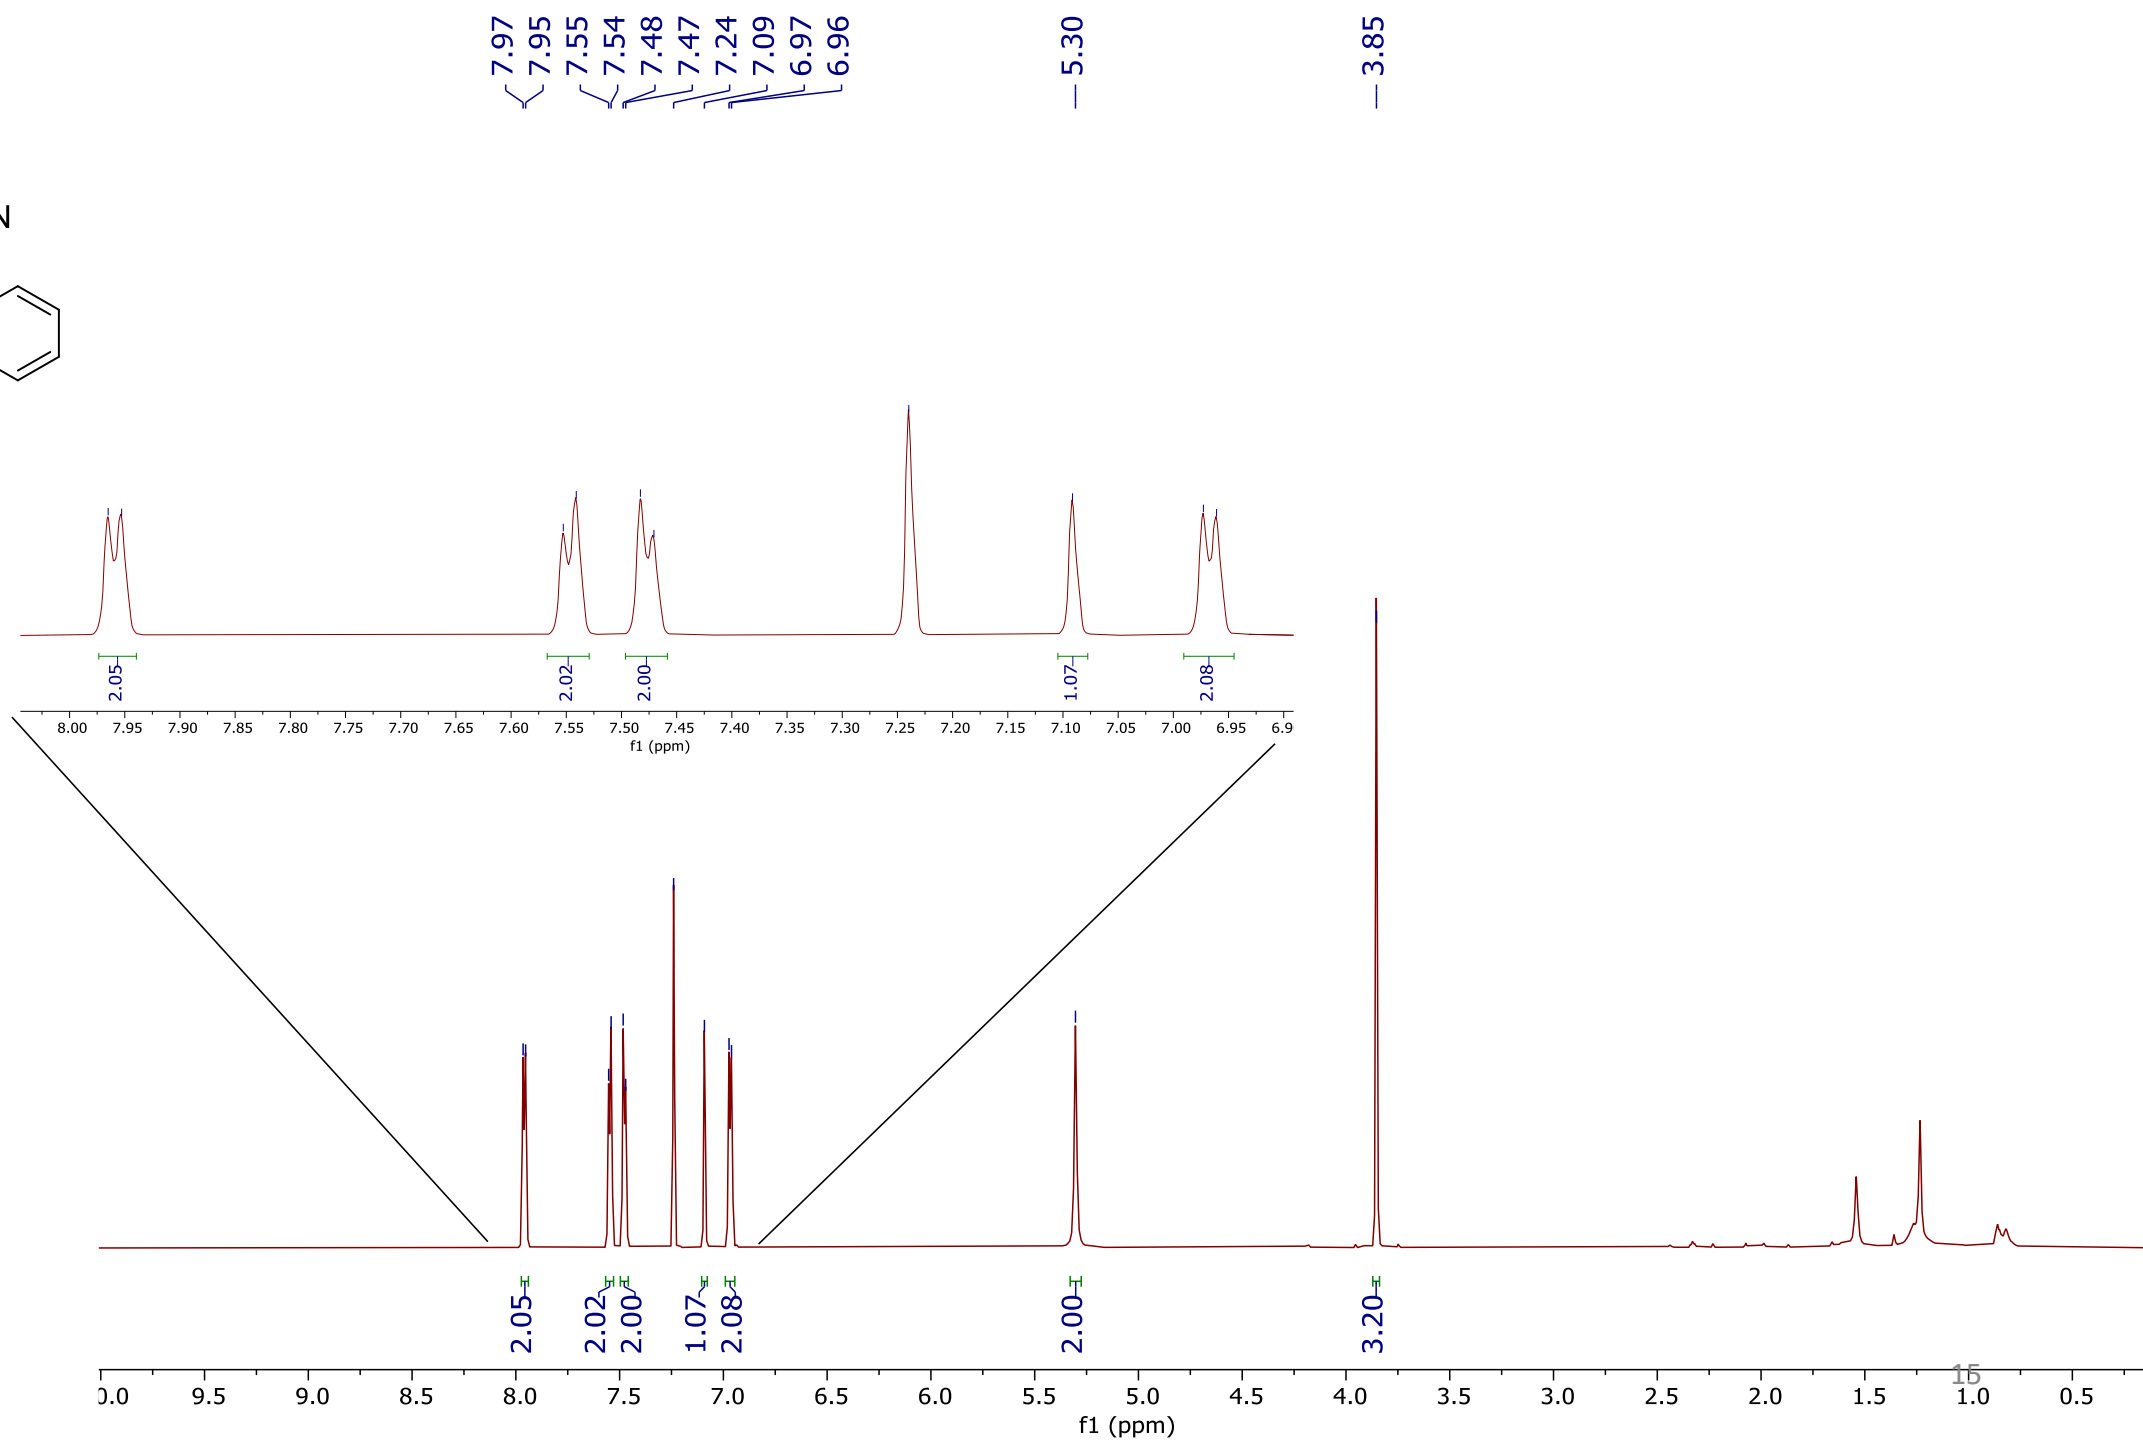

# <sup>13</sup>C-NMR of **5**

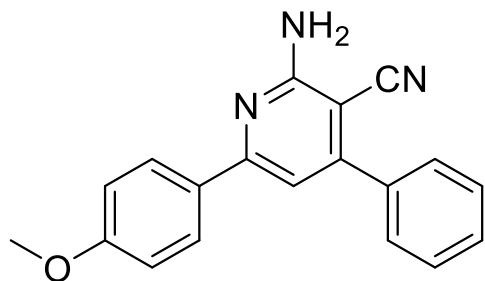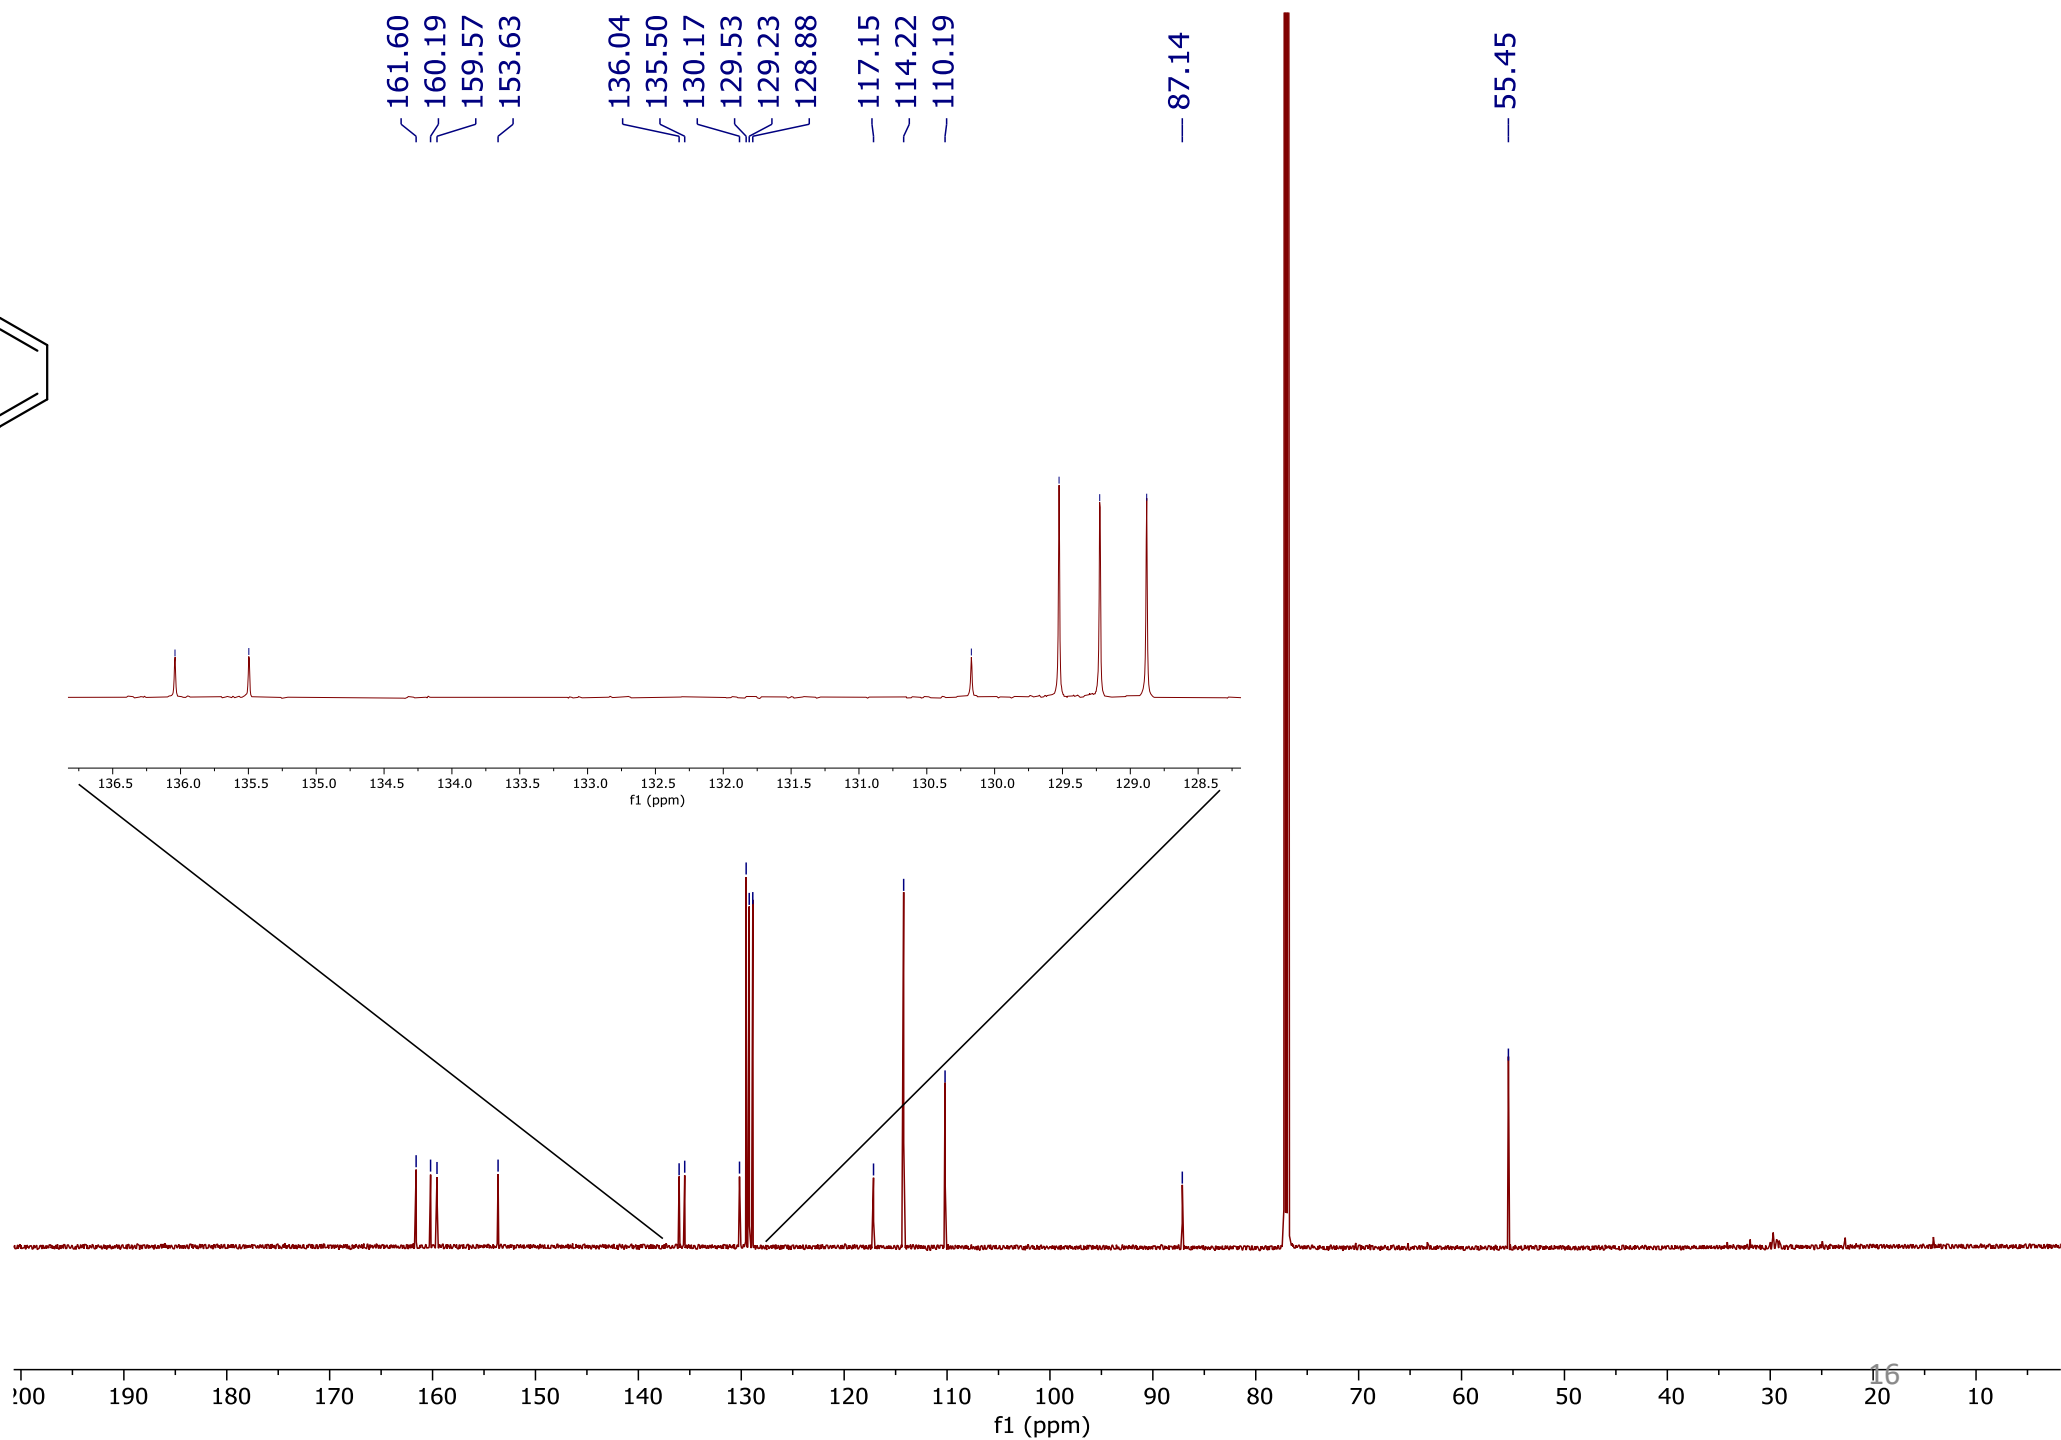



Mass Spectra of 5

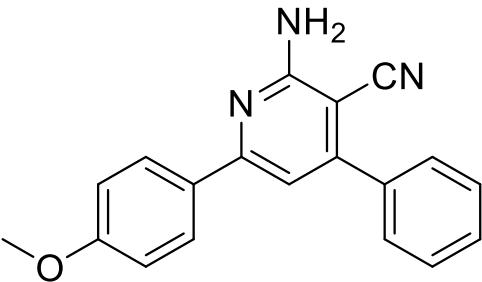

Exact Mass = 301.1215  
 $m/z = 302.0650$  [M+H]<sup>+</sup>;  $324.0657$  [M+Na]<sup>+</sup>

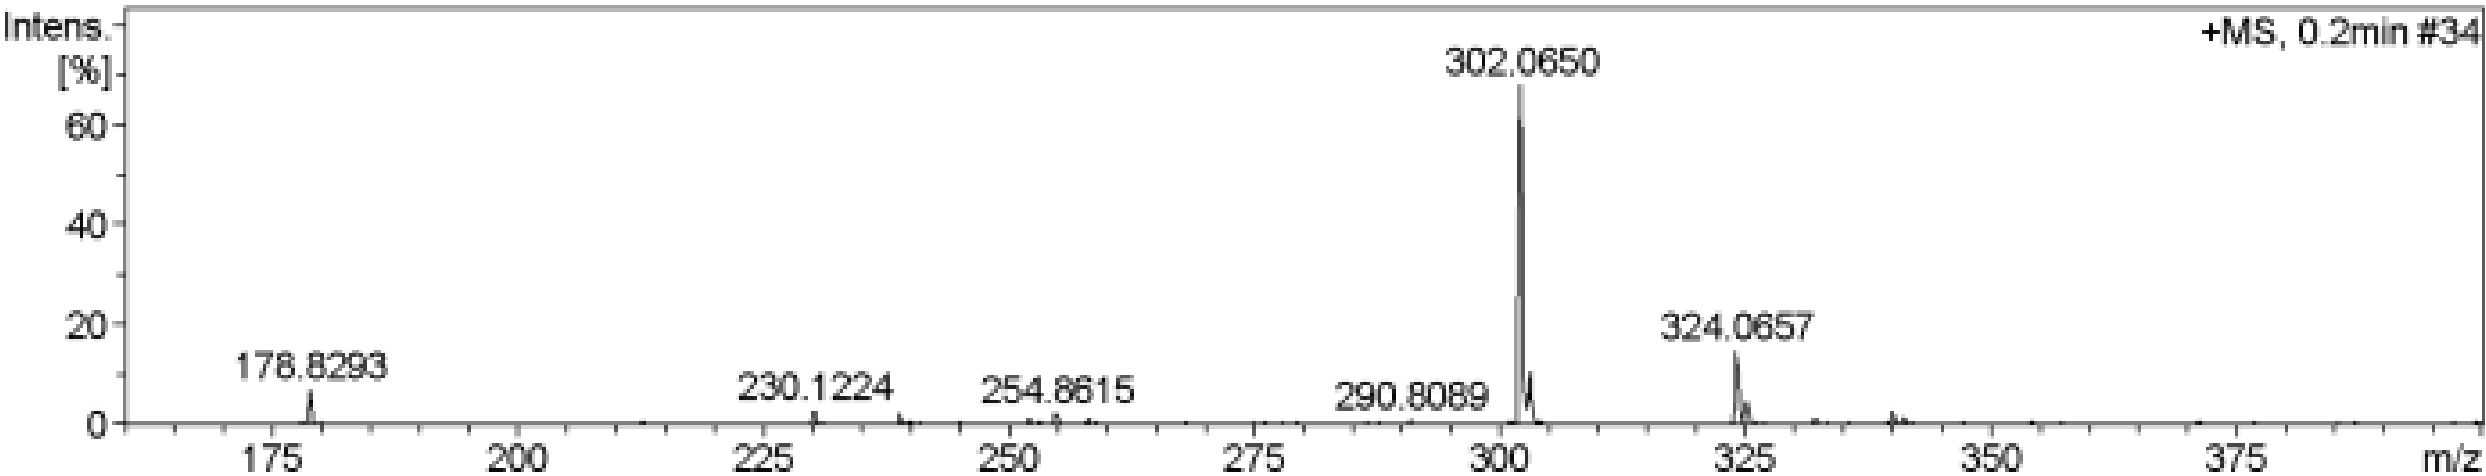

# <sup>1</sup>H-NMR of 6

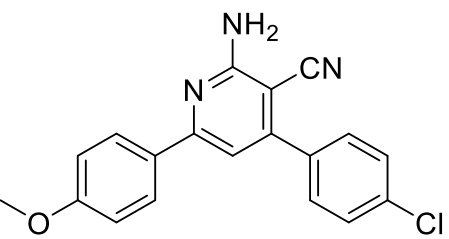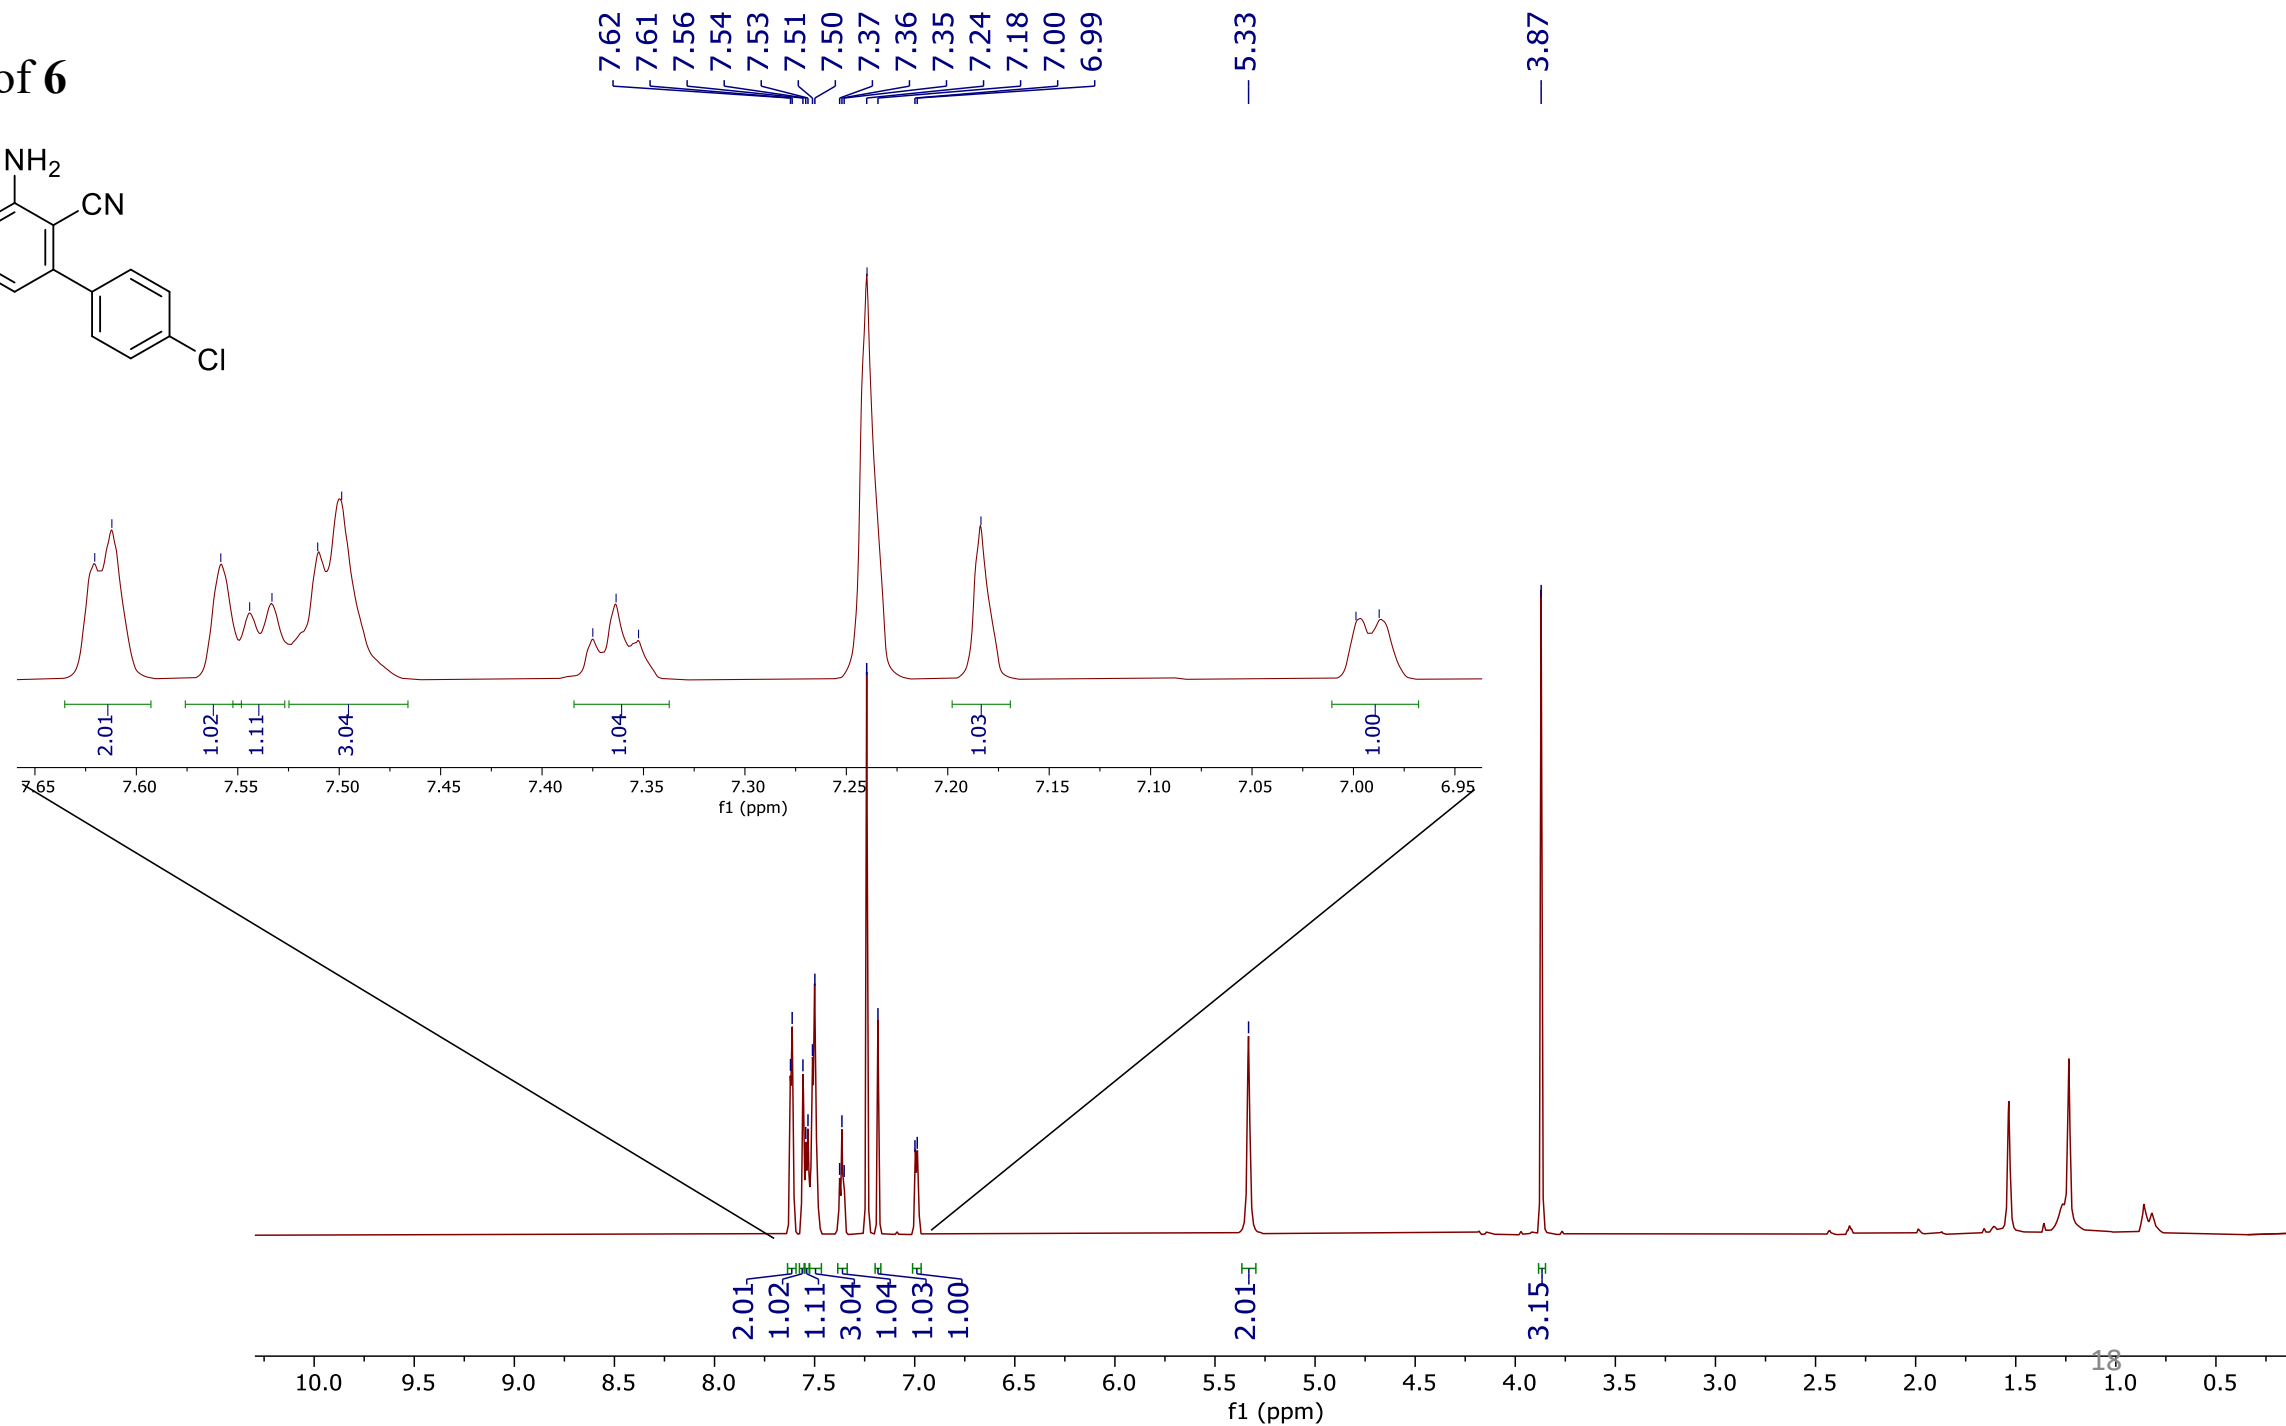

# <sup>13</sup>C-NMR of **6**

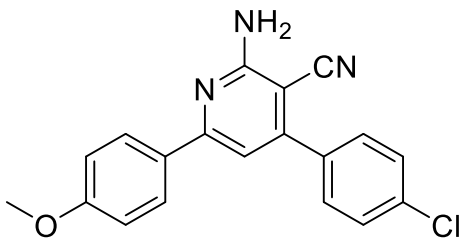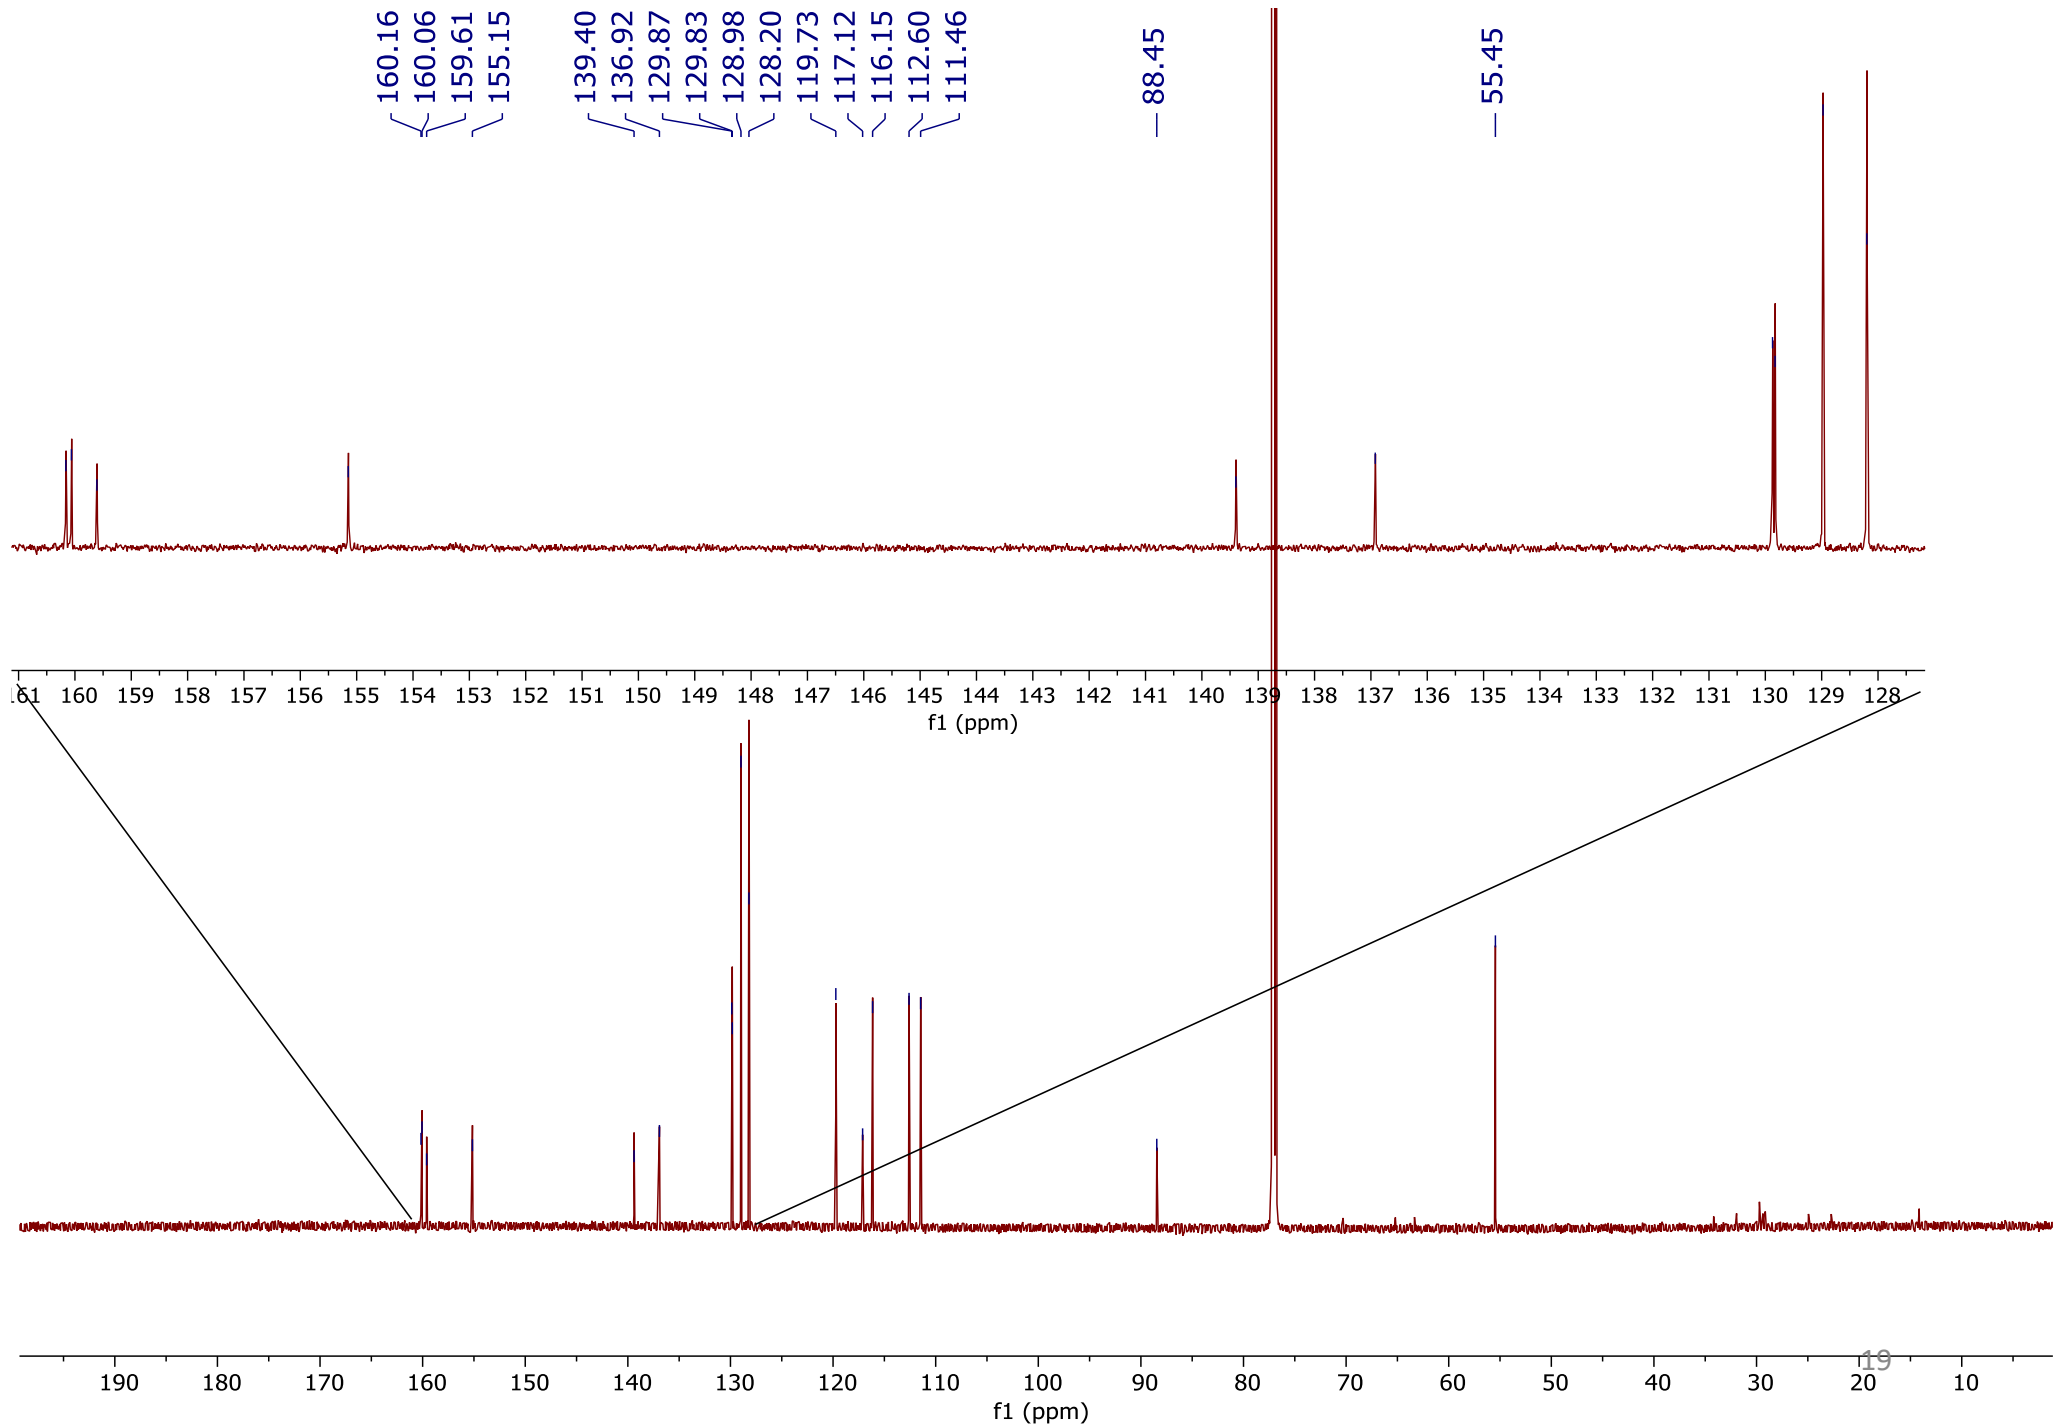

Mass Spectra of **6**

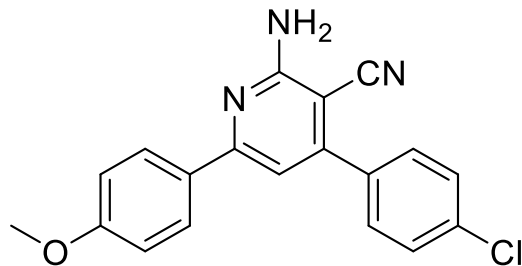

Exact Mass = 335.0825

$m/z$  336.116  $[M(^{35}\text{Cl})+H]^+$ ; 338.0885  $[M(^{37}\text{Cl})+H]^+$ ; 358.0559  $[M(^{35}\text{Cl})+Na]^+$ ; 359.9924  $[M(^{37}\text{Cl})+Na]^+$ .

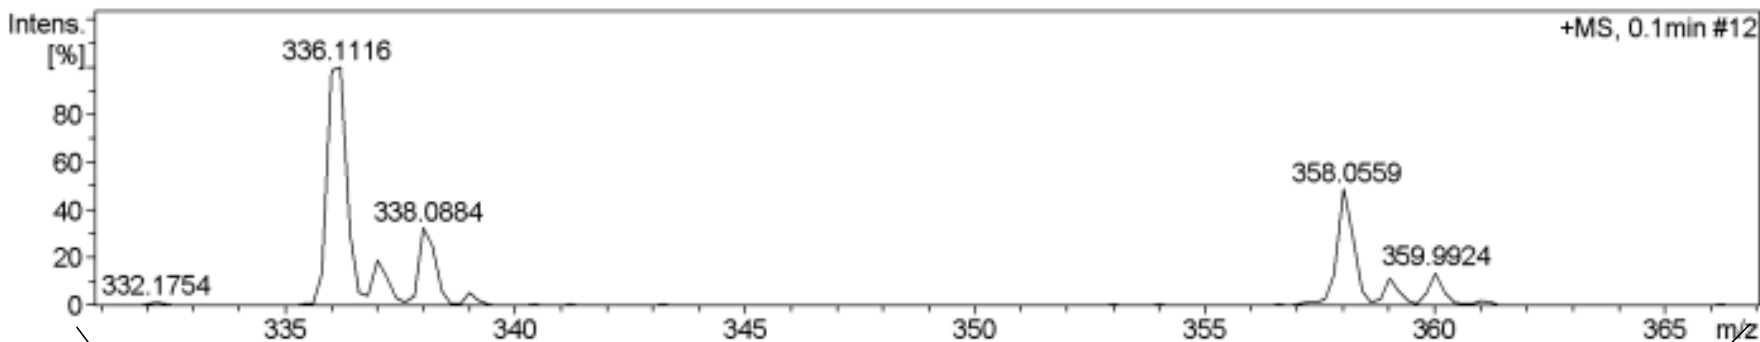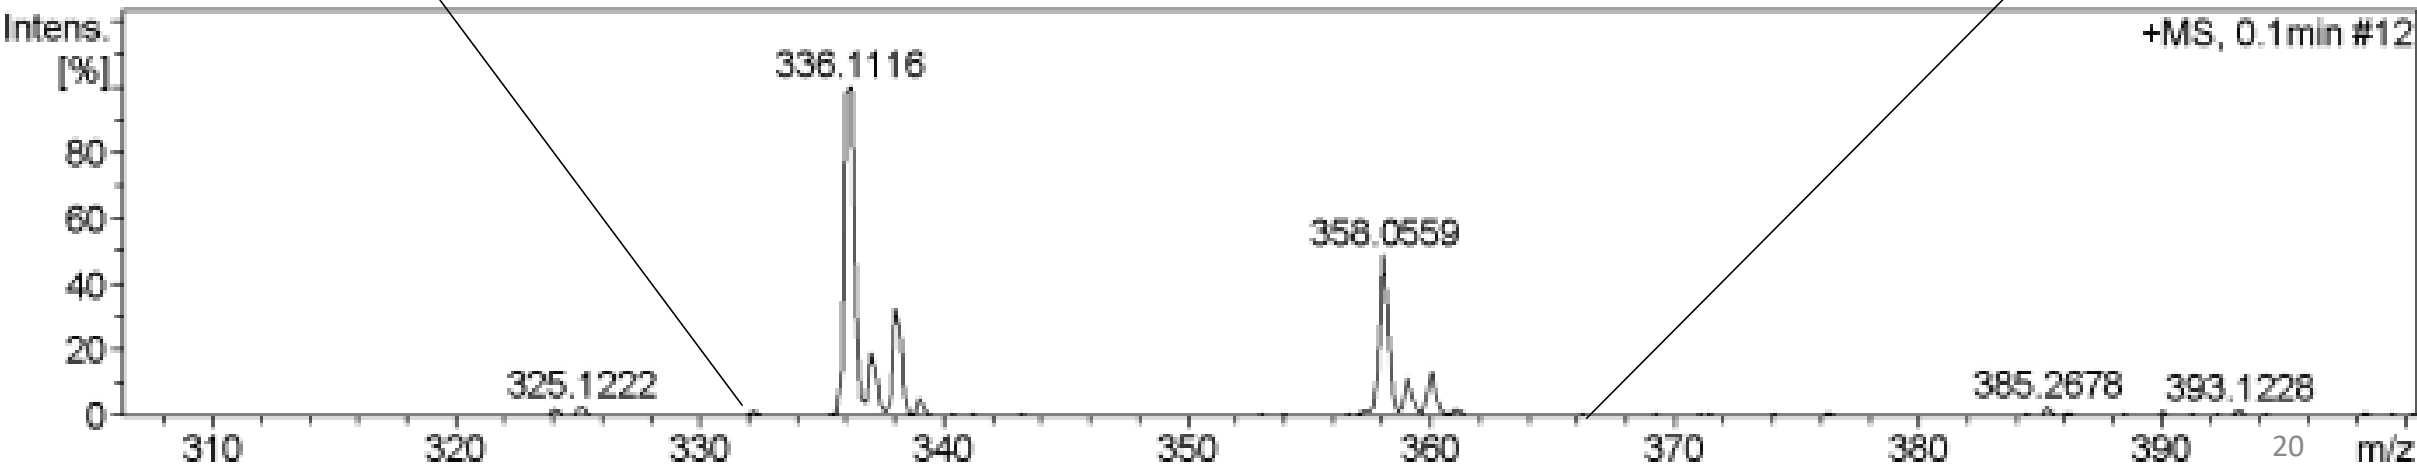

Supplement: s1 [file s1]
